# Supplementary material
Source: ML conference proceedings conference paper supplement (https://openreview.net/forum?id=rVT1GK60Nt)
Supplement: supplementary_material [file paper.pdf › paper.pdf]

---

# On the Optimal Construction of Unbiased Gradient Estimators for Zeroth-Order Optimization

---

Anonymous Author(s)

Affiliation

Address

email

## Abstract

1 Zeroth-order optimization (ZOO) is an important framework for stochastic opti-  
2 mization when gradients are unavailable or expensive to compute. A potential  
3 limitation of existing ZOO methods is the bias inherent in most gradient estimators  
4 unless the perturbation stepsize vanishes. In this paper, we overcome this biased-  
5 ness issue by proposing a novel family of *unbiased* gradient estimators based solely  
6 on function evaluations. By reformulating directional derivatives as a telescoping  
7 series and sampling from carefully designed distributions, we construct estimators  
8 that eliminate bias while maintaining favorable variance. We analyze their theo-  
9 retical properties, derive optimal scaling distributions and perturbation stepsizes  
10 of four specific constructions, and prove that SGD using the proposed estimators  
11 achieves optimal complexity for smooth non-convex objectives. Experiments on  
12 synthetic tasks and language model fine-tuning confirm the superior accuracy and  
13 convergence of our approach compared to standard methods.

## 14 1 Introduction

15 In this paper, we consider the problem of *zeroth-order optimization (ZOO)*, where our goal is to solve  
16 the following stochastic optimization problem:

$$\min_{x \in \mathbb{R}^d} f(x) := \mathbb{E}_{\xi \sim \Xi} f(x; \xi), \quad (1)$$

17 where  $f(x; \xi)$  is a smooth loss function evaluated on data  $\xi$  drawn from a distribution  $\Xi$ . In many  
18 practical scenarios, gradient information is either unavailable or prohibitively expensive to compute.  
19 Due to its versatility, ZOO has been widely adopted across various domains, including black-box  
20 adversarial attacks on machine learning models [Chen et al., 2017, Kurakin et al., 2016, Papernot  
21 et al., 2017, Cai et al., 2021, Zhao et al., 2020], physics-informed neural networks interfacing with  
22 external PDE solvers [Shen et al., 2024, Ma et al., 2025], and reinforcement learning [Choromanski  
23 et al., 2018, Lei et al., 2022, Suh et al., 2022]. Recent research on ZOO also focuses on enhancing  
24 memory efficiency [Cai et al., 2022a,b, Li et al., 2024, Sugiura and Matsutani, 2025], motivated in  
25 large part by fine-tuning large language models [Malladi et al., 2023, Zhang et al., 2024, Gautam  
26 et al., 2024, Tang et al., 2024, Wang et al., 2024, 2025].

27 Unlike first-order methods that rely on stochastic gradients  $\nabla f(x; \xi)$ , ZOO uses only function  
28 evaluations, without access to gradient information. To approximate gradients, several estimators  
29 have been proposed, including the one-point estimate  $\hat{\nabla} f(x; \xi) = \frac{f(x + \mu v; \xi) - f(x; \xi)}{\mu} v$  [Flaxman et al., 2005,  
30 Shamir, 2013, Bach and Perchet, 2016, Nesterov and Spokoiny, 2017, Berahas et al., 2022] and  
31 two-point estimator  $\hat{\nabla} f(x; \xi) = \frac{f(x + \mu v; \xi) - f(x - \mu v; \xi)}{2\mu} v$  [Ghadimi and Lan, 2013, Duchi et al., 2015,  
32 Nesterov and Spokoiny, 2017] (see Appendix A.1 for further discussions). The random direction  $v$  is  
33 typically drawn from a Gaussian or uniform spherical distribution, while alternative choices have

also gained increasing attention in recent years [Ghadimi and Lan, 2013, Duchi et al., 2015, Ji et al., 2019, Sahu et al., 2019, Coope and Tappenden, 2020, Kozak et al., 2023, Rando et al., 2024a,b, Ma and Huang, 2025].

However, despite these advancements, a critical limitation arises in zeroth-order gradient estimation; that is, all widely used gradient estimators exhibit inherent bias. Specifically, unless the perturbation step size  $\mu$  asymptotically tends to zero, these estimators yield persistently biased approximations of the true gradient. This inherent bias motivates a central question explored in this paper:

**Q1:** *Is it possible to design an unbiased zeroth-order gradient estimator using only function evaluations?*

**Contribution 1:** In this paper, we answer **Q1** affirmatively. Contrary to the belief that zeroth-order gradient estimators must inherently be biased due to finite-step perturbations, we demonstrate that it is indeed possible to construct *unbiased* gradient estimators using only function evaluations. Our key idea is to express  $\nabla_v f(x)$  (in the deterministic setting), the directional derivative along the direction  $v$ , as a telescoping series:

$$\begin{aligned} \nabla_v f(x) &:= \lim_{\mu_n \rightarrow 0} \frac{f(x + \mu_n v) - f(x)}{\mu_n} \\ &= \sum_{n=1}^{\infty} p_n \left[ \frac{f(x + \mu_1 v) - f(x)}{\mu_1} + \frac{1}{p_n} \left( \frac{f(x + \mu_{n+1} v) - f(x)}{\mu_{n+1}} - \frac{f(x + \mu_n v) - f(x)}{\mu_n} \right) \right], \quad (2) \\ &\stackrel{(i)}{=} \mathbb{E}_{n \sim \{p_n\}_{n=1}^{\infty}} \left[ \frac{f(x + \mu_1 v) - f(x)}{\mu_1} + \frac{1}{p_n} \left( \frac{f(x + \mu_{n+1} v) - f(x)}{\mu_{n+1}} - \frac{f(x + \mu_n v) - f(x)}{\mu_n} \right) \right] \end{aligned}$$

where the perturbation stepsize  $\mu_n \rightarrow 0$  as  $n \rightarrow \infty$ , the sampling distribution  $\{p_n\}_{n=1}^{\infty}$  form a probability distribution (that is,  $0 < p_i < 1$  for all  $i \in \mathbb{N}$  and  $\sum_{i=1}^{\infty} p_i = 1$ ), and the expectation representation (i) holds under mild regularity conditions (Proposition 2.1). This formulation allows us to reinterpret the directional derivative as an expectation over  $n \sim \{p_n\}_{n=1}^{\infty}$ , enabling the construction of an unbiased gradient estimator family  $\mathcal{P}$  (Definition 2.2):

$$\hat{\nabla}_v f(x) := \mathbb{E}_{n \sim p} P(n, v),$$

where  $P(n, v)$  is an unbiased estimator of

$$\frac{f(x + \mu_1 v) - f(x)}{\mu_1} + \frac{1}{p_n} \left( \frac{f(x + \mu_{n+1} v) - f(x)}{\mu_{n+1}} - \frac{f(x + \mu_n v) - f(x)}{\mu_n} \right).$$

Within this framework, we propose four specific estimators, denoted as  $P_k$ -estimator for  $k = 1, 2, 3, 4$ , corresponding to the number of function evaluations required in each estimation. To the best of our knowledge, unbiased zeroth-order gradient estimators have received little attention in prior literature. The only existing work we are aware of is the four-point estimator proposed by Chen [2020], which shares the same telescoping structure and can be viewed as a special case of our  $P_4$ -estimator.

**Contribution 2:** Building on our unbiased estimator construction, we conduct a rigorous variance analysis on our proposed  $P_k$ -estimators. We first present a negative result for the  $P_1$ -estimator; although it requires fewer function evaluations, it may exhibit infinite variance under certain conditions (Theorem 3.1 (a)), which aligns with the one-point estimator in the randomized smoothing [Flaxman et al., 2005]. Next, we characterize the relation among the variance of the  $P_k$ -estimator ( $k = 2, 3, 4$ ), the perturbation stepsize sequence  $\{\mu_n\}_{n=1}^{\infty}$ , and the sampling distribution  $\{p_n\}_{n=1}^{\infty}$  (Theorem 3.1 (b)). Identifying the optimal choice of  $\{\mu_n\}_{n=1}^{\infty}$  and  $\{p_n\}_{n=1}^{\infty}$  leads us to the following *non-convex functional optimization* problem:

$$\begin{aligned} \min_{\{\mu_n\}_{n=1}^{\infty}, \{p_n\}_{n=1}^{\infty}} \quad & \mathbb{E}_{n \sim \{p_n\}_{n=1}^{\infty}} \left( \frac{\mu_n - \mu_{n+1}}{p_n} \right)^2 \\ \text{subject to} \quad & 0 < p_n < 1; \sum_{n=1}^{\infty} p_n = 1; \sum_{n=1}^{\infty} \mu_n < \infty. \end{aligned} \quad (3)$$

We present an explicit analytical solution to this optimization problem (Theorem 3.2), which reveals two key insights: (1) our constructed unbiased gradient estimators can achieve the same variance as the classical two-point estimator without introducing additional bias, leading to the best-possible complexity for SGD algorithm (Corollary 3.5); (2) a broad class of sampling distributions can achieve the minimum variance, extending beyond the specific choices considered in prior work [Chen, 2020]. While our theoretical results establish strong guarantees, an important practical question remains:

**Q2:** Given the optimal choice of  $\{\mu_n\}_{n=1}^\infty$  and  $\{p_n\}_{n=1}^\infty$ , do the proposed unbiased estimators empirically outperform existing zeroth-order methods?

**Contribution 3:** To address Q2, we empirically validate our proposed approach across both synthetic and practical tasks. On estimating the gradient of mean-square and logistic losses, our method achieves significantly lower gradient estimation error compared to standard zeroth-order methods (Section 4.1). Furthermore, when applied to fine-tuning large language models, the proposed estimators demonstrate faster convergence and higher final accuracy under the same number of function evaluations (Section 4.2). These results confirm the practical advantages of our unbiased construction and underscore its effectiveness in modern zeroth-order optimization tasks.

## 2 The Derivation of Unbiased Zeroth-Order Estimators

We will start from the deterministic case then turn to the stochastic case in Section 3.3. In this section, we formally derive a class of unbiased estimators for approximating the gradient  $\nabla f(x)$  using only function evaluations. We also provide a sufficient condition under which the telescoping series in Eq. (4) admits the expectation representation. All proofs are provided in the appendix.

### 2.1 Telescoping Series and Expectation Representation

For a fixed direction  $v \in \mathbb{R}^d$ , the directional derivative of a differentiable function  $f : \mathbb{R}^d \rightarrow \mathbb{R}$  at  $x$  along the direction  $v$  is defined as

$$\nabla_v f(x) = \lim_{\mu \rightarrow 0} \frac{f(x + \mu v) - f(x)}{\mu}.$$

Then for any decreasing sequence  $\{\mu_n\}_{n=1}^\infty$  with  $\lim_{n \rightarrow \infty} \mu_n = 0$ , one can express this directional derivative as the limit of a convergent sequence  $\left\{ \frac{f(x + \mu_n v) - f(x)}{\mu_n} \right\}$ :

$$\nabla_v f(x) = \lim_{n \rightarrow \infty} \frac{f(x + \mu_n v) - f(x)}{\mu_n}.$$

This convergent sequence canonically induces a telescoping series with the same limit:

$$\nabla_v f(x) = \frac{f(x + \mu_1 v) - f(x)}{\mu_1} + \sum_{n=1}^{\infty} \left[ \frac{f(x + \mu_{n+1} v) - f(x)}{\mu_{n+1}} - \frac{f(x + \mu_n v) - f(x)}{\mu_n} \right]. \quad (4)$$

Next, consider a probability mass function (PMF)  $\{p_n\}_{n=1}^\infty$  with  $p_n > 0$  for all  $n$  and  $\sum_{n=1}^\infty p_n = 1$ . When the series in Eq. (4) is *absolutely convergent*<sup>1</sup>, we can interpret it as an expectation over a discrete random variable  $n$ . That is,

$$\begin{aligned} \nabla_v f(x) &= \sum_{n=1}^{\infty} p_n \left[ \frac{f(x + \mu_1 v) - f(x)}{\mu_1} + \frac{1}{p_n} \left( \frac{f(x + \mu_{n+1} v) - f(x)}{\mu_{n+1}} - \frac{f(x + \mu_n v) - f(x)}{\mu_n} \right) \right] \\ &= \mathbb{E} \left[ \frac{f(x + \mu_1 v) - f(x)}{\mu_1} + \frac{1}{p_n} \left( \frac{f(x + \mu_{n+1} v) - f(x)}{\mu_{n+1}} - \frac{f(x + \mu_n v) - f(x)}{\mu_n} \right) \right]. \end{aligned} \quad (5)$$

<sup>1</sup>We follow the standard definition from Spivak [2008]: A series  $\sum_{n=1}^\infty a_n$  is called *convergent*, if the limit of its finite sum  $\lim_{N \rightarrow \infty} \sum_{n=1}^N a_n$  exists. A series  $\sum_{n=1}^\infty a_n$  is called *absolutely convergent*, if the series  $\sum_{n=1}^\infty |a_n|$  is convergent. See the formal definition in Appendix B.1.

**On the Role of Absolute Convergence.** The absolute convergence of the series in Eq. (4) plays a critical role in interpreting the telescoping series as an expectation. This is due to the difference between the series convergence and the existence of expectation: A convergent series can yield different values depending on the order of summation (this result is called the Riemann series theorem [Riemann, 1868, Spivak, 2008]); however, the outcomes of a random variable have no naturally given order (which makes it different from a series), which requires a random variable’s expectation to be well-defined regardless of any such ordering. While the expectation representation has been discussed in prior work (e.g., [Chen, 2020]), the lack of attention to absolute convergence has left the conditions ensuring unbiasedness underexplored.

Due to this reason, we provide the following (mild) sufficient condition for ensuring the absolute convergence with adding a slightly stronger requirement on the objective function  $f : \mathbb{R}^d \rightarrow \mathbb{R}$  and the sequence  $\{\mu_n\}_{n=1}^\infty$ :

**Proposition 2.1.** *If the second-order continuously differentiable function  $f : \mathbb{R}^d \rightarrow \mathbb{R}$  has  $L$ -Lipschitz continuous gradient and  $\sum_{n=1}^\infty \mu_n < \infty$ , then the series*

$$\sum_{n=1}^\infty p_n \left[ \frac{f(x + \mu_1 v) - f(x)}{\mu_1} + \frac{1}{p_n} \left( \frac{f(x + \mu_{n+1} v) - f(x)}{\mu_{n+1}} - \frac{f(x + \mu_n v) - f(x)}{\mu_n} \right) \right]$$

is absolutely convergent and its limit is  $\nabla_v f(x)$ .

## 2.2 The Construction of Unbiased Estimators

With the expectation representation in place, we are ready to define the class of unbiased estimators explicitly.

**Definition 2.2.** Suppose that the function  $f : \mathbb{R}^d \rightarrow \mathbb{R}$  is continuously differentiable and  $\{\mu_n\}_{n \geq 1}$  is a positive sequence with  $\lim_{n \rightarrow \infty} \mu_n = 0$  such that the telescoping series

$$\frac{f(x + \mu_1 v) - f(x)}{\mu_1} + \sum_{n=1}^\infty \left[ \frac{f(x + \mu_{n+1} v) - f(x)}{\mu_{n+1}} - \frac{f(x + \mu_n v) - f(x)}{\mu_n} \right]$$

is absolutely convergent, the sequence  $\{p_n\}_{n=1}^\infty$  forms a PMF, and  $V$  is the distribution over  $\mathbb{R}^d$ . Then the family of estimators  $\mathcal{P} := \mathcal{P}(f, \{\mu_n\}_{n=1}^\infty, \{p_n\}_{n=1}^\infty, V)$  denote the class of random variables such that for every  $P(n, v) \in \mathcal{P}$ , it satisfies

$$\mathbb{E}[P(n, v) \mid n, v] = \frac{f(x + \mu_1 v) - f(x)}{\mu_1} + \frac{1}{p_n} \left( \frac{f(x + \mu_{n+1} v) - f(x)}{\mu_{n+1}} - \frac{f(x + \mu_n v) - f(x)}{\mu_n} \right),$$

where  $v$  is sampled from  $V$ , independent with  $n \sim \{p_n\}_{n=1}^\infty$ .

In the following theorem, we formally prove that our proposed class  $\mathcal{P}$  is exactly the unbiased estimator of the gradient  $\nabla f(x)$ .

**Theorem 2.3 (Unbiasedness).** *Let  $\mathcal{P} := \mathcal{P}(f, \{\mu_n\}_{n=1}^\infty, \{p_n\}_{n=1}^\infty, V)$  is defined as Definition 2.2. Then, for any estimator  $P(n, v) \in \mathcal{P}$ , the following hold:*

(a)  $\mathbb{E}[P(n, v) \mid v] = \nabla_v f(x)$ ; that is,  $P(n, v)$  is an unbiased estimator of the directional derivative  $\nabla_v f(x)$ .

(b) If the random direction  $v$  is chosen independently of the sampling  $n \sim \{p_n\}_{n=1}^\infty$  and satisfies  $\mathbb{E}[v v^\top] = I$ , then

$$\mathbb{E}_{n \sim \{p_n\}_{n=1}^\infty, v \sim V} [P(n, v) v] = \nabla f(x),$$

so that  $P(n, v) v$  is an unbiased estimator of the gradient  $\nabla f(x)$ .

## 2.3 Specific Constructions

In this subsection, we propose four concrete constructions from the estimator family (Definition 2.2)

$$\mathcal{P} := \mathcal{P}(f, \{\mu_n\}_{n=1}^\infty, \{p_n\}_{n=1}^\infty, V)$$

based on the number of function evaluations used in estimating the gradient. These constructions are designed to explore two main aspects: (1) the trade-off between the estimator variance and the number of function evaluations, allowing flexibility depending on the computational budget; and (2) a fundamental question purely driven by the theoretical interest: *What is the minimum number of function evaluations required to construct an unbiased gradient estimator?*

123 **P<sub>4</sub>-Estimator.** This estimator corresponds to the four-point estimator originally proposed by [Chen](#)  
 124 [\[2020\]](#) with slightly generalizing the choice of the perturbation stepsize sequence  $\{\mu_n\}_{n=1}^\infty$  and the  
 125 sampling distribution  $\{p_n\}_{n=1}^\infty$ . For a given direction  $v \sim V$  and  $n \sim \{p_n\}_{n=1}^\infty$ , the P<sub>4</sub>-estimator is  
 126 defined as

$$P_4(n, v) = \frac{f(x + \mu_1 v) - f(x)}{\mu_1} + \frac{1}{p_n} \left[ \frac{f(x + \mu_{n+1} v) - f(x)}{\mu_{n+1}} - \frac{f(x + \mu_n v) - f(x)}{\mu_n} \right]. \quad (6)$$

127 This construction requires four function evaluations at:  $x$ ,  $x + \mu_1 v$ ,  $x + \mu_n v$ , and  $x + \mu_{n+1} v$ ,  
 128 exhibiting the lowest variance and the most function evaluation counts among all members of  $\mathcal{P}$ .

129 **P<sub>3</sub>-Estimator.** We can reduce one function evaluation by introducing a selection random variable  
 130  $U_2 \sim \text{Uniform}(\{0, 1\})^2$ . The estimator is then defined as

$$P_3(n, v) = \frac{f(x + \mu_1 v) - f(x)}{\mu_1} U_2 + \frac{1}{p_n} \left[ \frac{f(x + \mu_{n+1} v) - f(x)}{\mu_{n+1}} - \frac{f(x + \mu_n v) - f(x)}{\mu_n} \right] (1 - U_2). \quad (7)$$

131 This construction randomly selects one of two pathways: With probability 1/2, it uses the first term  
 132 only and requires two function evaluations at  $x + \mu_1 v$  and  $x$ ; otherwise, it uses the second term  
 133 and requires three function evaluations at  $x + \mu_n v$ ,  $x + \mu_{n+1} v$ , and  $x$ . This estimator maintains  
 134 unbiasedness as P<sub>4</sub>, with slightly higher variance.

135 **P<sub>1</sub>- & P<sub>2</sub>-Estimator.** The selection random variable can be naturally extended to construct P<sub>1</sub>- and  
 136 P<sub>2</sub>-estimators as follows:

$$P_2(n, v) = \frac{f(x + \mu_1 v) - f(x)}{\mu_1} \mathbb{I}_{\{U_3=0\}} + \frac{1}{p_n} \left[ \frac{f(x + \mu_{n+1} v) - f(x)}{\mu_{n+1}} \mathbb{I}_{\{U_3=1\}} - \frac{f(x + \mu_n v) - f(x)}{\mu_n} \mathbb{I}_{\{U_3=2\}} \right], \quad (8)$$

$$P_1(n, v) = \frac{f(x + \mu_1 v) \mathbb{I}_{\{U_4=1\}} - f(x) \mathbb{I}_{\{U_4=0\}}}{\mu_1} + \frac{1}{p_n} \left[ \frac{f(x + \mu_{n+1} v) \mathbb{I}_{\{U_4=2\}} - f(x) \mathbb{I}_{\{U_4=0\}}}{\mu_{n+1}} - \frac{f(x + \mu_n v) \mathbb{I}_{\{U_4=3\}} - f(x) \mathbb{I}_{\{U_4=0\}}}{\mu_n} \right], \quad (9)$$

137 where  $U_3 \sim \text{Uniform}(\{0, 1, 2\})$ ,  $U_4 \sim \text{Uniform}(\{0, 1, 2, 3\})$ , and  $\mathbb{I}_A$  is the indicator function,  
 138 which equals 1 if the event  $A$  occurs, and 0 otherwise. of the event  $A$ . Remarkably, the construction  
 139 of P<sub>1</sub>-estimator achieves unbiasedness using only a single function evaluation. However, we will  
 140 show that in the next section, P<sub>1</sub>-estimator will have infinite variance under certain condition.

### 141 3 Variance Analysis of Unbiased Zeroth-Order Estimators

142 In this section, we provide a theoretical analysis of the variance behavior for the unbiased estimator  
 143 family  $\mathcal{P} = \mathcal{P}(f, \{\mu_n\}_{n=1}^\infty, \{p_n\}_{n=1}^\infty, V)$  ([Definition 2.2](#)). While the unbiasedness has been shown  
 144 in [Theorem 2.3](#), their variances can differ dramatically depending on the estimator construction. In  
 145 particular, we prove that the variance becomes unbounded (i.e., infinite) for certain constructions  
 146 such as P<sub>1</sub>-estimator. We also provide finite-variance bounds for P<sub>k</sub>-estimators (for  $k = 2, 3, 4$ ) with  
 147 matching the optimal variance under specific choices of  $\{p_n\}$  and  $\{\mu_n\}$ .

#### 148 3.1 Theoretical Analysis

149 In the following result, we adopt the same condition as [Proposition 2.1](#) to ensure the expectation  
 150 representation.

---

<sup>2</sup>Here we use  $\text{Uniform}(A)$  to represent the uniform distribution over the finite or compact set  $A$ .

**Theorem 3.1.** Let  $\mathcal{P} := \mathcal{P}(f, \{\mu_n\}_{n=1}^\infty, \{p_n\}_{n=1}^\infty, V)$  is defined as [Definition 2.2](#). Suppose that  $f : \mathbb{R}^d \rightarrow \mathbb{R}$  is second-order continuously differentiable and has  $L$ -Lipschitz continuous gradient,  $\sum_{n=1}^\infty \mu_n < \infty$ , and  $V$  is the uniform distribution over the sphere with the radius  $\sqrt{d}$ . Define

$$\mu := \mu_1, \quad \varrho := \sum_{n=1}^\infty \frac{(\mu_{n+1} - \mu_n)^2}{p_n}, \quad \text{and} \quad \varphi := \sum_{n=1}^\infty \frac{\mu_n^2}{p_n}.$$

Then the following statements hold:

- (a) If there exists a point  $x \in \mathbb{R}^d$  such that the Hessian  $\nabla^2 f(x)$  is positive definite and  $f(x) \neq 0$ , then the variances of the  $P_1$  for estimating  $\nabla f(x)$  is infinite.
- (b) The variance of  $P_k$ -estimator  $P_k(n, v)v$  ( $k = 2, 3, 4$ ) for estimating  $\nabla f(x)$  is given by

$$\begin{aligned} \text{Var}[P_2(n, v)v] &\leq \text{Var}[P_4(n, v)v] + \frac{L^2}{3}d^3\mu^2 + \frac{L^2}{12}d^3\varrho + \frac{L^2}{3}d^3\varphi. \\ \text{Var}[P_3(n, v)v] &\leq \text{Var}[P_4(n, v)v] + \frac{L^2}{8}d^3\mu^2 + \frac{L^2}{8}d^3\varrho. \\ \text{Var}[P_4(n, v)v] &\leq (d-1)\|\nabla f(x)\|^2 + \frac{3L^2}{4}d^3\mu^2 + \frac{L^2d^3}{2}\varrho. \end{aligned}$$

*Proof.* Part (a) directly follows by analyzing the tail of  $\frac{1}{p_n} \frac{f(x+\mu_n v)}{\mu_n}$  and leveraging the curvature from a positive definite Hessian. For the part (b), we simply decompose the variance of  $P_2(n, v)v$  and  $P_3(n, v)v$  into the variance of estimating  $P_4(n, v)v$  using

$$\text{Var}[Pv] = d\mathbb{E}[(P - P_4(n, v))^2] + \text{Var}[P_4(n, v)v]$$

for arbitrary  $P := P(n, v) \in \mathcal{P}$ . Then we apply the second-order Taylor expansions with the mean value theorem to control the finite-difference noise. Full details and auxiliary lemmas are provided in [Appendix C](#).  $\square$

**Comparison with Existing Literature.** [Theorem 3.1](#) reveals that while  $P_1$  is unbiased, its variance can be infinite under certain conditions, making them unsuitable for SGD. In contrast,  $P_k$ -estimator ( $k = 2, 3, 4$ ) offer the finite variance when  $\{\mu_n\}_{n=1}^\infty$  and  $\{p_n\}_{n=1}^\infty$  are appropriately selected. We will show it later that under the optimal setting, their variances match the optimal order of classical two-point estimators [\[Nesterov and Spokoiny, 2017\]](#) but with zero bias:

$$\text{Var}[P_k v] = \mathcal{O}(d\|\nabla f(x)\|^2 + d^3\mu^2).$$

This variance will lead to the optimal function query complexity  $\mathcal{O}(\frac{d}{\epsilon^4})$  for achieving  $\epsilon$ -accuracy in the gradient norm  $\|\nabla f(x)\|$  [\[Duchi et al., 2015\]](#).

### 3.2 On the Optimal Choices of $\{\mu_n\}_{n=1}^\infty$ and $\{p_n\}_{n=1}^\infty$

In previous section, [Theorem 3.1](#) connects the perturbation stepsize sequence  $\{\mu_n\}$ , the sampling distribution  $\{p_n\}$ , and the variance upper bounds of our constructed unbiased estimators, which has received limited discussion in the existing literature. To control the variance term, one must ensure that  $\varrho := \sum_{n=1}^\infty \frac{(\mu_{n+1} - \mu_n)^2}{p_n}$  (and  $\varphi := \sum_{n=1}^\infty \frac{\mu_n^2}{p_n}$  for  $P_2$ -estimator) is sufficiently small. This observation naturally raises the question: What are the optimal sequences  $\{\mu_n\}_{n=1}^\infty$  and  $\{p_n\}_{n=1}^\infty$  that minimize this sum? The following theorem addresses this question:

**Theorem 3.2.** Let  $\{\mu_n\}_{n=1}^\infty$  be a positive, decreasing sequence with  $\sum_{n=1}^\infty \mu_n < \infty$ , and let  $\{p_n\}_{n=1}^\infty$  be a PMF. Denote  $\mu := \mu_1$ . Then the following statements hold:

- (a) The lower bound of  $\varrho$  is given by  $\varrho \geq \mu^2$ . Moreover, the equality holds if and only if  $p_n = \frac{\mu_n - \mu_{n+1}}{\mu}$ .
- (b) The lower bound of  $\varphi$  is given by  $\varphi \geq \left(\sum_{n=1}^\infty \mu_n\right)^2 > \mu^2$ . Moreover, the equality holds if and only if  $p_n = \frac{\mu_n}{\sum_{n=1}^\infty \mu_n}$ .



179 This result characterizes the choices of  $\{\mu_n\}_{n=1}^\infty$  and  $\{p_n\}_{n=1}^\infty$  that minimizes  $\varrho$  (and  $\varphi$  for the  
180  $P_2$ -estimator), leading to the variance upper bound of the form:

$$\max\{\text{Var}[P_2(n, v)v], \text{Var}[P_3(n, v)v], \text{Var}[P_4(n, v)v]\} \leq \mathcal{O}(d\|\nabla f(x)\|^2 + d^3\mu^2).$$

181 Here, we can always choose  $\{\mu_n\}_{n=1}^\infty$  for the  $P_2$ -estimator such that  $\mu_1 \approx \sum_{n=2}^\infty \mu_n$  to nearly match  
182 the lower bound ( $\approx \mu_1^2$ ).

183 **Sampling from the Optimal Sampling Distribution**  $\{p_n\}_{n=1}^\infty$ . When the perturbation stepsize  
184 sequence  $\{\mu_n\}_{n=1}^\infty$  is given, sampling the corresponding optimal distribution  $p_n = \frac{\mu_n - \mu_{n+1}}{\mu_1}$  could be  
185 difficult; in most of cases,  $\{p_n\}_{n=1}^\infty$  cannot be a ready-to-use distribution naively supported by existing  
186 software. Fortunately, we can do it conversely: given an arbitrary PMF  $\{p_n\}_{n=1}^\infty$ , the perturbation  
187 stepsize takes the form

$$\mu_n = \mu_1 \mathbb{P}(N \geq n), \quad \text{where } N \sim \{p_n\}_{n=1}^\infty,$$

188 providing a practical way to implement the unbiased zeroth-order gradient estimator. To illustrate  
189 this point, we provide two concrete examples.

**Example 3.3** (Geometric  $P_k$ -Estimators). We consider the geometric distribution  $n \sim \text{Geom}(c)$   
( $c \in (0, 1)$ ). Then  $p_n = (1 - c)c^{n-1}$  for all  $n \in \mathbb{N}$ . We define  $\mu_n$  by the recursion  $\mu_n - \mu_{n+1} =$   
 $\mu_1 p_n = \mu_1(1 - c)c^{n-1}$ . Summing this relation leads to the closed-form solution

$$\mu_n = \mu_1 c^{n-1}$$

190 and the optimal value  $\varrho = \mu_1^2$ . This construction recovers the geometric sampling scheme used by  
191 [Chen \[2020\]](#). We call the  $P_k$ -estimator constructed on the geometric distribution as the *geometric*  
192  *$P_k$ -estimator*. It is easy to verify that the corresponding  $\varphi$  is given as  $\varphi = \sum_{n=1}^\infty \frac{\mu_n^2}{p_n} = \frac{\mu_1^2}{(1-c)^2}$ .

**Example 3.4** (Zipf's  $P_k$ -Estimators). We consider the Zipf's distribution  $n \sim \text{Zipf}(s)$  ( $s > 1$ ). Then  
 $p_n = \frac{1}{\zeta(s)} \frac{1}{n^s}$  for all  $n \in \mathbb{N}$ , where  $\zeta$  is the Riemannian zeta function defined as  $\zeta(s) = \sum_{n=1}^\infty \frac{1}{n^s}$ .  
We define  $\mu_n$  by the recursion  $\mu_n - \mu_{n+1} = \mu_1 p_n = \mu_1 \frac{1}{\zeta(s)} \frac{1}{n^s}$ . Summing this relation leads to the  
closed-form solution

$$\mu_n = \mu_1 \left[ 1 - \frac{\sum_{j=1}^{n-1} \frac{1}{j^s}}{\zeta(s)} \right].$$

193 This construction also leads to the optimal value  $\varrho = \mu_1^2$ . When estimating the upper bound of  $\varphi$ ,  
194 we additionally assume  $s > 3$ . In this case, we have  $\varphi = \sum_{n=1}^\infty \frac{\mu_n^2}{p_n} \leq \frac{\zeta(s-2)}{(s-1)^2 \zeta(s)} \mu_1^2$ . The detailed  
195 calculation is put in [Example C.7](#).

196 In both examples, we start with a well-known easy-to-sample distribution  $\{p_n\}_{n=1}^\infty$ , and calculate the  
197 associated perturbation stepsize sequence  $\{\mu_n\}_{n=1}^\infty$  either analytically (Geometric  $P_k$ -estimators) or  
198 iteratively (Zipf's  $P_k$ -estimators). While all estimators (i.e.  $P_k$ -estimator with  $k = 2, 3, 4$ ) achieve  
199 the optimal variance in the order with  $d$  and  $\mu$ , these examples indicate a key difference between  
200 the  $P_2$ -estimator and the  $P_k$ -estimator (for  $k = 3, 4$ ): the variance bound of  $P_3$ - and  $P_4$ -estimator is  
201 **parameter-agnostic**; that is, once  $\{p_n\}$  is specified, no additional tuning of distribution parameters is  
202 required to attain the optimal bound  $\mu^2$ . This distinction highlight the practical advantages of  $P_3$ -  
203 and  $P_4$ -estimators.

### 204 3.3 Convergence of SGD with Unbiased Gradient Estimators

205 In this subsection, we consider the stochastic optimization setting described in [Eq. \(1\)](#), where the goal  
206 is to estimate the stochastic gradient  $\nabla f(x; \xi)$  rather than the full gradient. Under the optimal  
207 sampling distribution  $\{p_n\}_{n=1}^\infty$  and the corresponding perturbation stepsize sequence  $\{\mu_n\}_{n=1}^\infty$ ,  
208 the convergence upper bound of SGD follows directly from standard results for general unbiased  
209 stochastic gradient methods.

**Corollary 3.5** ([Khaled and Richtárik \[2022\]](#)). Consider the stochastic optimization problem in [Eq. \(1\)](#),  
and suppose that the individual loss  $f(x; \xi)$  is second-order differentiable with  $L$ -Lipschitz continuous

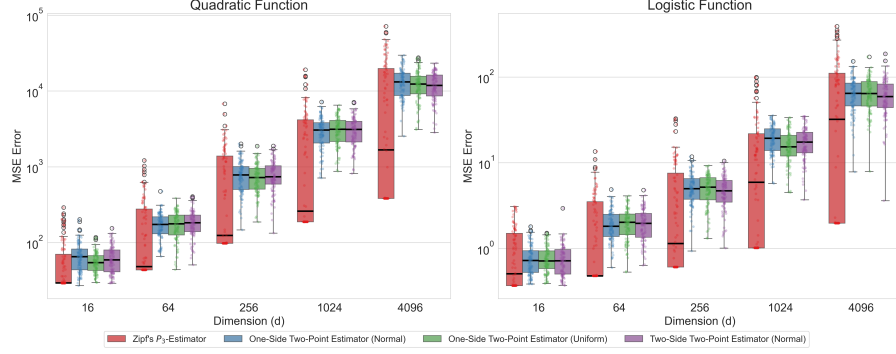

Figure 1: This figure presents the MSE error of four different estimators across various dimensions  $d$  ranging from 16 to 4096. The left panel corresponds to the quadratic loss  $f_{\text{reg}}$ , while the right panel illustrates results for the logistic loss  $f_{\text{cls}}$ . Each box plot describes the distribution of the MSE error across 100 random trials.

gradient in  $x$ , uniformly over  $\xi \sim \Xi$ . Assume the stochastic gradient is approximated using the  $P_k$ -estimator  $P_k(n, v)$  for  $k = 2, 3, 4$ . Let the SGD iteration be defined as  $x_{t+1} = x_t - \eta P_k(n_t, v_t) v_t$  where  $\eta \in (0, \frac{1}{L^2 d}]$  is the stepsize. Then the iterates satisfy the following convergence guarantee:

$$\min_{0 \leq t \leq T-1} \mathbb{E} \|\nabla f(x_t)\|^2 \leq \mathcal{O}(d^3 \mu^2 \eta + d\eta + \frac{2}{\eta T}).$$

Consequently, choosing  $\eta = \Theta(1/\sqrt{dT})$  and  $\mu = \mathcal{O}(\frac{1}{d})$  yields the optimal complexity  $T = \Theta(\frac{d}{\epsilon^4})$  of having  $\min_{0 \leq t \leq T-1} \mathbb{E} \|\nabla f(x_t)\| \leq \epsilon$ .

This complexity has matched the lower bound of solving a smooth non-convex optimization problem using first-order gradient-based method [Duchi et al., 2015] and cannot be further improved without adding additional assumptions. The  $L$ -Lipschitz continuous gradient condition can be further weakened to the expected smoothness assumption [Khaled and Richtárik, 2022].

## 4 Experiments

To validate our theoretical results and demonstrate the effectiveness of the proposed unbiased zeroth-order gradient estimators, we conduct experiments on two settings: synthetic objectives and language model optimization. Details and hyperparameter configurations are provided in Appendix E.

### 4.1 Synthetic Examples

We first evaluate our estimators on two classic loss functions [James et al., 2013]: the quadratic loss  $f_{\text{reg}} : \mathbb{R}^d \rightarrow \mathbb{R}$  for linear regression and the logistic loss  $f_{\text{cls}} : \mathbb{R}^d \rightarrow \mathbb{R}$  for binary classification.

$$f_{\text{reg}}(x) = x^\top A^\top A x, \quad f_{\text{cls}}(x) = \frac{1}{n} \sum_{i=1}^n \log(1 + \exp(-b_i \cdot (a_i^\top \cdot x))),$$

where each entry of  $A \in \mathbb{R}^{d \times d}$  is independently sampled from the uniform distribution  $U[-1, 1]$ , each feature vector  $a_i \in \mathbb{R}^d$  is sampled from the standard normal distribution  $\text{Normal}(0, I_d)$ , and  $b_i \in \{-1, 1\}$  are binary labels generated based on a Bernoulli distribution with the fixed sample size  $n$ . The gradient of each objective function can be explicitly evaluated; we compare the performance of different zeroth-order gradient estimator using the Mean-Square-Error (MSE), which is defined as

$$\text{MSE}(\hat{\nabla} f(x)) := [\hat{\nabla} f(x) - \nabla f(x)]^\top [\hat{\nabla} f(x) - \nabla f(x)]. \quad (10)$$

We compare the accuracy of estimating the gradient of two loss functions among four different gradient estimators including Zipf's  $P_3$ -estimator (Example 3.4), two-point estimator with Gaussian or uniform random perturbations, and centralized two-point estimator with uniform perturbation (the batch size of two-point estimators is adjusted to exactly 3 function evaluations). For detailed



hyper-parameter setting, we put in [Appendix E](#). Several observations can be made from the results shown in [Figure 1](#). First, comparing the same estimator across different dimensions, the MSE error for both objective functions generally increases with the dimension  $d$ , which is expected as higher-dimensional settings pose greater estimation challenges. Second, comparing different estimators, the Zipf’s  $P_3$ -estimator consistently achieves lower MSE compared to others. These results collectively demonstrate the effectiveness of our proposed estimator when estimating the gradient, especially in high-dimensional settings, which will be further validate in the next experiment.

## 4.2 Language Model Optimization

In this section, we demonstrate the practical applicability of the unbiased gradient estimators in optimizing the deep neural network. Particularly, we apply it to the task of fine-tuning a pre-trained language model. Using zeroth-order optimization to fine-tune the LLMs has been an active research field in recent years due to its effectiveness in saving memory [\[Malladi et al., 2023, Zhang et al., 2024, Gautam et al., 2024, Guo et al., 2024\]](#); it allows for fine-tuning model parameters without requiring access to the full computational graph, which can be prohibitively large for modern language models.

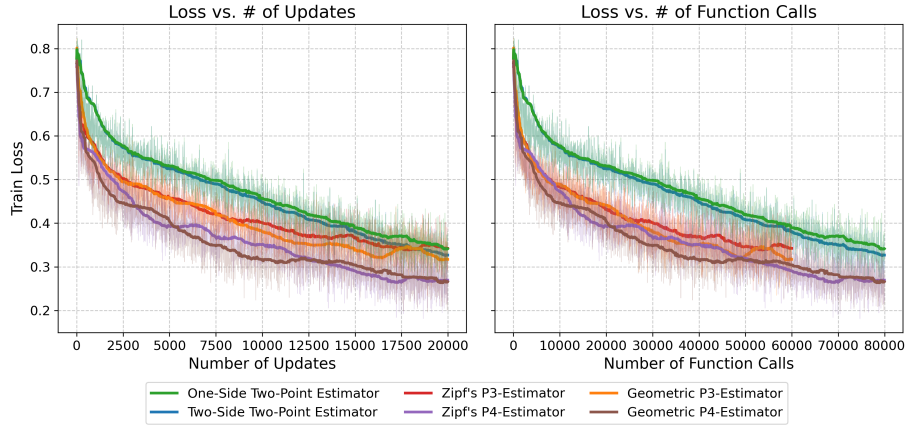

Figure 2: Comparison of training loss during fine-tuning of OPT-1.3B on SST-2 using different zeroth-order gradient estimators. The right panel rescales iterations by the number of function evaluations. The unbiased Zipf’s  $P_3$ -, Zipf’s  $P_4$ -, Geometric  $P_3$ -, and Geometric  $P_4$ -estimators achieve faster convergence under the same number of function evaluations.

We conducted experiments using the OPT-1.3b model [\[Zhang et al., 2022\]](#) for sentiment classification on the Stanford Sentiment Treebank (SST-2) dataset [\[Socher et al., 2013\]](#). To ensure fair comparison, we maintained consistent parameters across experiments: the learning rate  $\eta = 10^{-4}$  and the perturbation stepsize  $\mu = 10^{-3}$  (corresponding to  $\mu_1$  in the proposed unbiased estimators), which is taken from [Malladi et al. \[2023\]](#)’s Table 7 without additional tuning. For two-point estimators, we have adjusted the batch size to align 4 function evaluations. Detailed experimental settings are provided in [Appendix E](#). As shown in [Figure 2](#), zeroth-order optimization using the proposed unbiased zeroth-order estimators achieved superior performance compared to other baseline methods.

## 5 Conclusion

In this work, we proposed a novel class of unbiased zeroth-order gradient estimators based on a telescoping series expansion of directional derivatives. We established new theoretical results, including a sufficient condition for the expectation representation ([Proposition 2.1](#)), the unbiasedness of the proposed estimators ([Theorem 2.3](#)), a variance analysis for four specific constructions ([Theorem 3.1](#)), and the characterization of the optimal sampling distribution and perturbation stepsize sequence ([Theorem 3.2](#)). We further demonstrated that SGD equipped with our estimators achieves optimal sample complexity and empirically outperforms existing mini-batch two-point estimators. These results provide a principled foundation for a new class of estimators in zeroth-order optimization, offering both theoretical insights and practical improvements.

## References

- Francis Bach and Vianney Perchet. Highly-smooth zero-th order online optimization. In *Conference on Learning Theory*, pages 257–283. PMLR, 2016.
- Albert S Berahas, Liyuan Cao, Krzysztof Choromanski, and Katya Scheinberg. A theoretical and empirical comparison of gradient approximations in derivative-free optimization. *Foundations of Computational Mathematics*, 22(2):507–560, 2022.
- HanQin Cai, Yuchen Lou, Daniel McKenzie, and Wotao Yin. A zeroth-order block coordinate descent algorithm for huge-scale black-box optimization. In *International Conference on Machine Learning*, pages 1193–1203. PMLR, 2021.
- HanQin Cai, Daniel McKenzie, Wotao Yin, and Zhenliang Zhang. A one-bit, comparison-based gradient estimator. *Applied and Computational Harmonic Analysis*, 60:242–266, 2022a.
- HanQin Cai, Daniel McKenzie, Wotao Yin, and Zhenliang Zhang. Zeroth-order regularized optimization (zoro): Approximately sparse gradients and adaptive sampling. *SIAM Journal on Optimization*, 32(2):687–714, 2022b.
- Guanting Chen. Unbiased gradient simulation for zeroth-order optimization. In *2020 Winter Simulation Conference (WSC)*, pages 2947–2959. IEEE, 2020.
- Lesi Chen, Jing Xu, and Luo Luo. Faster gradient-free algorithms for nonsmooth nonconvex stochastic optimization. In *International Conference on Machine Learning*, pages 5219–5233. PMLR, 2023.
- Pin-Yu Chen, Huan Zhang, Yash Sharma, Jinfeng Yi, and Cho-Jui Hsieh. Zoo: Zeroth order optimization based black-box attacks to deep neural networks without training substitute models. In *Proceedings of the 10th ACM workshop on artificial intelligence and security*, pages 15–26, 2017.
- Krzysztof Choromanski, Mark Rowland, Vikas Sindhwani, Richard Turner, and Adrian Weller. Structured evolution with compact architectures for scalable policy optimization. In *International Conference on Machine Learning*, pages 970–978. PMLR, 2018.
- Ian D Coope and Rachael Tappenden. Gradient and hessian approximations in derivative free optimization. *arXiv preprint arXiv:2001.08355*, 2020.
- Liyi Dai. Convergence rates of finite difference stochastic approximation algorithms. *arXiv preprint arXiv:1506.09211*, 2015.
- Damek Davis, Dmitriy Drusvyatskiy, Yin Tat Lee, Swati Padmanabhan, and Guanhao Ye. A gradient sampling method with complexity guarantees for lipschitz functions in high and low dimensions. *Advances in Neural Information Processing Systems*, 35:6692–6703, 2022.
- Aaron Defazio, Francis Bach, and Simon Lacoste-Julien. Saga: A fast incremental gradient method with support for non-strongly convex composite objectives. *Advances in neural information processing systems*, 27, 2014.
- John C Duchi, Michael I Jordan, Martin J Wainwright, and Andre Wibisono. Optimal rates for zero-order convex optimization: The power of two function evaluations. *IEEE Transactions on Information Theory*, 61(5): 2788–2806, 2015.
- Cong Fang, Chris Junchi Li, Zhouchen Lin, and Tong Zhang. Spider: Near-optimal non-convex optimization via stochastic path-integrated differential estimator. *Advances in neural information processing systems*, 31, 2018.
- Abraham D Flaxman, Adam Tauman Kalai, and H Brendan McMahan. Online convex optimization in the bandit setting: Gradient descent without a gradient. In *Proceedings of the sixteenth annual ACM-SIAM symposium on Discrete algorithms*, pages 385–394. SIAM, 2005.
- Gerald B. Folland. *Advanced Calculus*. Prentice Hall, Upper Saddle River, NJ, 2002. ISBN 0130652652.
- Tanmay Gautam, Youngsuk Park, Hao Zhou, Parameswaran Raman, and Wooseok Ha. Variance-reduced zeroth-order methods for fine-tuning language models. *arXiv preprint arXiv:2404.08080*, 2024.
- Saeed Ghadimi and Guanghui Lan. Stochastic first-and zeroth-order methods for nonconvex stochastic programming. *SIAM journal on optimization*, 23(4):2341–2368, 2013.
- Bin Gu, Xiyuan Wei, Shangqian Gao, Ziran Xiong, Cheng Deng, and Heng Huang. Black-box reductions for zeroth-order gradient algorithms to achieve lower query complexity. *Journal of Machine Learning Research*, 22(170):1–47, 2021.

314 Wentao Guo, Jikai Long, Yimeng Zeng, Zirui Liu, Xinyu Yang, Yide Ran, Jacob R Gardner, Osbert Bastani,  
315 Christopher De Sa, Xiaodong Yu, et al. Zeroth-order fine-tuning of llms with extreme sparsity. *arXiv preprint*  
316 *arXiv:2406.02913*, 2024.

317 Feihu Huang, Bin Gu, Zhouyuan Huo, Songcan Chen, and Heng Huang. Faster gradient-free proximal stochastic  
318 methods for nonconvex nonsmooth optimization. In *Proceedings of the AAAI Conference on Artificial*  
319 *Intelligence*, volume 33-01, pages 1503–1510, 2019.

320 Gareth James, Daniela Witten, Trevor Hastie, Robert Tibshirani, et al. *An introduction to statistical learning*,  
321 volume 112-1. Springer, 2013.

322 Kaiyi Ji, Zhe Wang, Yi Zhou, and Yingbin Liang. Improved zeroth-order variance reduced algorithms and  
323 analysis for nonconvex optimization. In *International conference on machine learning*, pages 3100–3109.  
324 PMLR, 2019.

325 Rie Johnson and Tong Zhang. Accelerating stochastic gradient descent using predictive variance reduction.  
326 *Advances in neural information processing systems*, 26, 2013.

327 Ahmed Khaled and Peter Richtárik. Better theory for sgd in the nonconvex world. *Transactions on Machine*  
328 *Learning Research*, 2022.

329 Guy Kornowski and Ohad Shamir. An algorithm with optimal dimension-dependence for zero-order nonsmooth  
330 nonconvex stochastic optimization. *Journal of Machine Learning Research*, 25(122):1–14, 2024.

331 David Kozak, Cesare Molinari, Lorenzo Rosasco, Luis Tenorio, and Silvia Villa. Zeroth-order optimization with  
332 orthogonal random directions. *Mathematical Programming*, 199(1-2):1179–1219, 2023.

333 Alexey Kurakin, Ian Goodfellow, and Samy Bengio. Adversarial machine learning at scale. *arXiv preprint*  
334 *arXiv:1611.01236*, 2016.

335 Yuheng Lei, Jianyu Chen, Shengbo Eben Li, and Sifa Zheng. Zeroth-order actor-critic. *arXiv preprint*  
336 *arXiv:2201.12518*, 2022.

337 Zeman Li, Xinwei Zhang, Peilin Zhong, Yuan Deng, Meisam Razaviyayn, and Vahab Mirrokni. Addax: Utilizing  
338 zeroth-order gradients to improve memory efficiency and performance of sgd for fine-tuning language models.  
339 *arXiv preprint arXiv:2410.06441*, 2024.

340 Tianyi Lin, Zeyu Zheng, and Michael Jordan. Gradient-free methods for deterministic and stochastic nonsmooth  
341 nonconvex optimization. *Advances in Neural Information Processing Systems*, 35:26160–26175, 2022.

342 Sijia Liu, Bhavya Kailkhura, Pin-Yu Chen, Paishun Ting, Shiyu Chang, and Lisa Amini. Zeroth-order stochastic  
343 variance reduction for nonconvex optimization. *Advances in Neural Information Processing Systems*, 31,  
344 2018.

345 Sijia Liu, Pin-Yu Chen, Bhavya Kailkhura, Gaoyuan Zhang, Alfred O Hero III, and Pramod K Varshney. A  
346 primer on zeroth-order optimization in signal processing and machine learning: Principals, recent advances,  
347 and applications. *IEEE Signal Processing Magazine*, 37(5):43–54, 2020.

348 Shaocong Ma and Heng Huang. Revisiting zeroth-order optimization: Minimum-variance two-point esti-  
349 mators and directionally aligned perturbations. In *The Thirteenth International Conference on Learning*  
350 *Representations*, 2025. URL <https://openreview.net/forum?id=ywFOSIT9ik>.

351 Shaocong Ma, James Diffenderfer, Bhavya Kailkhura, and Yi Zhou. Deep learning of pde correction and mesh  
352 adaption without automatic differentiation. *Machine Learning*, 114(3):61, Feb 2025. ISSN 1573-0565. doi:  
353 10.1007/s10994-025-06746-9. URL <https://doi.org/10.1007/s10994-025-06746-9>.

354 Sadhika Malladi, Tianyu Gao, Eshaan Nichani, Alex Damian, Jason D Lee, Danqi Chen, and Sanjeev Arora.  
355 Fine-tuning language models with just forward passes. *Advances in Neural Information Processing Systems*,  
356 36:53038–53075, 2023.

357 Yurii Nesterov and Vladimir Spokoiny. Random gradient-free minimization of convex functions. *Foundations of*  
358 *Computational Mathematics*, 17:527–566, 2017.

359 Lam M Nguyen, Jie Liu, Katya Scheinberg, and Martin Takáč. Sarah: A novel method for machine learning  
360 problems using stochastic recursive gradient. In *International conference on machine learning*, pages  
361 2613–2621. PMLR, 2017.

362 Nicolas Papernot, Patrick McDaniel, Ian Goodfellow, Somesh Jha, Z Berkay Celik, and Ananthram Swami.  
363 Practical black-box attacks against machine learning. In *Proceedings of the 2017 ACM on Asia conference on*  
364 *computer and communications security*, pages 506–519, 2017.

365 Marco Rando, Cesare Molinari, Lorenzo Rosasco, and Silvia Villa. An optimal structured zeroth-order algorithm  
366 for non-smooth optimization. *Advances in Neural Information Processing Systems*, 36, 2024a.

367 Marco Rando, Cesare Molinari, Silvia Villa, and Lorenzo Rosasco. Stochastic zeroth order descent with  
368 structured directions. *Computational Optimization and Applications*, pages 1–37, 2024b.

369 Bernhard Riemann. Über die darstellbarkeit einer function durch eine trigonometrische reihe. *Abhandlungen der*  
370 *Königlichen Gesellschaft der Wissenschaften zu Göttingen*, 13:87–132, 1868. URL <https://eudml.org/doc/135759>.

372 Anit Kumar Sahu, Manzil Zaheer, and Soumya Kar. Towards gradient free and projection free stochastic  
373 optimization. In *The 22nd International Conference on Artificial Intelligence and Statistics*, pages 3468–3477.  
374 PMLR, 2019.

375 Ohad Shamir. On the complexity of bandit and derivative-free stochastic convex optimization. In *Conference on*  
376 *learning theory*, pages 3–24. PMLR, 2013.

377 Ohad Shamir. An optimal algorithm for bandit and zero-order convex optimization with two-point feedback.  
378 *Journal of Machine Learning Research*, 18(52):1–11, 2017.

379 Qianli Shen, Yezhen Wang, Zhouhao Yang, Xiang Li, Haonan Wang, Yang Zhang, Jonathan Scarlett, Zhanxing  
380 Zhu, and Kenji Kawaguchi. Memory-efficient gradient unrolling for large-scale bi-level optimization. *arXiv*  
381 *preprint arXiv:2406.14095*, 2024.

382 Richard Socher, Alex Perelygin, Jean Wu, Jason Chuang, Christopher D. Manning, Andrew Ng, and Christopher  
383 Potts. Recursive deep models for semantic compositionality over a sentiment treebank. In *Proceedings of*  
384 *the 2013 Conference on Empirical Methods in Natural Language Processing*, pages 1631–1642, Seattle,  
385 Washington, USA, October 2013. Association for Computational Linguistics. URL <https://www.aclweb.org/anthology/D13-1170>.

387 Michael Spivak. *Calculus*. Publish or Perish, Inc., Houston, TX, USA, 4 edition, 2008. ISBN 978-0-914098-91-1.

388 Keisuke Sugiura and Hiroki Matsutani. Elasticzo: A memory-efficient on-device learning with combined  
389 zeroth-and first-order optimization. *arXiv preprint arXiv:2501.04287*, 2025.

390 Hyung Ju Suh, Max Simchowitz, Kaiqing Zhang, and Russ Tedrake. Do differentiable simulators give better  
391 policy gradients? In *International Conference on Machine Learning*, pages 20668–20696. PMLR, 2022.

392 Xinyu Tang, Ashwinee Panda, Milad Nasr, Saeed Mahloujifar, and Prateek Mittal. Private fine-tuning of large  
393 language models with zeroth-order optimization. *arXiv preprint arXiv:2401.04343*, 2024.

394 Fei Wang, Li Shen, Liang Ding, Chao Xue, Ye Liu, and Changxing Ding. Simultaneous computation and memory  
395 efficient zeroth-order optimizer for fine-tuning large language models. *arXiv preprint arXiv:2410.09823*,  
396 2024.

397 Liangyu Wang, Jie Ren, Hang Xu, Junxiao Wang, Huanyi Xie, David E Keyes, and Di Wang. Zo2: Scalable  
398 zeroth-order fine-tuning for extremely large language models with limited gpu memory. *arXiv preprint*  
399 *arXiv:2503.12668*, 2025.

400 Jingzhao Zhang, Hongzhou Lin, Stefanie Jegelka, Suvrit Sra, and Ali Jadbabaie. Complexity of finding  
401 stationary points of nonconvex nonsmooth functions. In *International Conference on Machine Learning*,  
402 pages 11173–11182. PMLR, 2020.

403 Susan Zhang, Stephen Roller, Naman Goyal, Mikel Artetxe, Moya Chen, Shuohui Chen, Christopher Dewan,  
404 Mona Diab, Xian Li, Xi Victoria Lin, et al. Opt: Open pre-trained transformer language models. *arXiv*  
405 *preprint arXiv:2205.01068*, 2022.

406 Yihua Zhang, Pingzhi Li, Junyuan Hong, Jiayang Li, Yimeng Zhang, Wenqing Zheng, Pin-Yu Chen, Jason D.  
407 Lee, Wotao Yin, Mingyi Hong, Zhangyang Wang, Sijia Liu, and Tianlong Chen. Revisiting zeroth-order  
408 optimization for memory-efficient llm fine-tuning: A benchmark, 2024.

409 Pu Zhao, Pin-Yu Chen, Siyue Wang, and Xue Lin. Towards query-efficient black-box adversary with zeroth-order  
410 natural gradient descent. In *Proceedings of the AAAI Conference on Artificial Intelligence*, volume 34-04,  
411 pages 6909–6916, 2020.

# Appendix

## Table of Contents

|                                                                                 |           |
|---------------------------------------------------------------------------------|-----------|
| <b>A Additional Backgrounds</b>                                                 | <b>13</b> |
| A.1 Gradient Estimators in Zeroth-Order Optimization                            | 13        |
| A.2 Zeroth-Order SGD and Its Variants                                           | 14        |
| <b>B Bias Analysis</b>                                                          | <b>15</b> |
| B.1 Absolute Convergence                                                        | 15        |
| B.2 Unbiasedness of Zeroth-Order Estimators in $\mathcal{P}$ -Family            | 16        |
| <b>C Variance Analysis</b>                                                      | <b>17</b> |
| C.1 Variance of $P_1$ -Estimator                                                | 18        |
| C.2 Variance of $P_4$ -Estimator                                                | 18        |
| C.3 Variance of $P_2$ -Estimator                                                | 20        |
| C.4 Variance of $P_3$ -Estimator                                                | 21        |
| C.5 On the Optimal Sampling Distribution and the Perturbation Stepsize Sequence | 22        |
| C.6 Discussions: Variance of Random Directional Derivative                      | 23        |
| <b>D Convergence Analysis</b>                                                   | <b>23</b> |
| D.1 The Convergence Upper Bound                                                 | 24        |
| D.2 Supporting Lemmas                                                           | 24        |
| <b>E Experiments Details</b>                                                    | <b>25</b> |
| E.1 Synthetic Example                                                           | 25        |
| E.2 Language Model Optimization                                                 | 25        |
| <b>F Broader Impact</b>                                                         | <b>26</b> |
| <b>G Limitations</b>                                                            | <b>26</b> |

## A Additional Backgrounds

### A.1 Gradient Estimators in Zeroth-Order Optimization

**One-Point Zeroth-Order Estimator** One-point estimators represent the simplest class, needing only a single function query per estimate. This construction makes them suitable when queries are costly or limited, like in online settings [Flaxman et al., 2005]. A common form, motivated by Gaussian smoothing [Nesterov and Spokoiny, 2017], is

$$(\text{Single-Point}) \quad \hat{\nabla}_{\text{sgl}} f(x) = \frac{1}{\mu} f(x + \mu v) v,$$

where  $v$  is often drawn from  $\text{Normal}(0, I_d)$ . While the expectation  $\mathbb{E}[\frac{1}{\mu} f(x + \mu v) v]$  approximates the gradient of the smoothed function  $\nabla_x [\mathbb{E}_{v \sim \text{Normal}(0, I_d)} f(x + \mu v)]$ , the estimator is biased regarding the true gradient  $\nabla f(x)$ . This bias diminishes as the smoothing parameter  $\mu \rightarrow 0$  [Berahas et al., 2022]. However, these estimators suffer from high variance, potentially scaling with  $d^2$  and exploding as  $\mu \rightarrow 0$  [Flaxman et al., 2005].

447 **Two-Point Zeroth-Order Estimator** Two-point estimators improve on one-point methods by using  
 448 two function evaluations, often via a finite difference along a random direction [Shamir, 2017]. The  
 449 standard difference form is

$$\begin{aligned} \text{(Two-Side)} \quad \hat{\nabla}_{2\text{-side}} f(x) &= \frac{f(x + \mu v) - f(x - \mu v)}{\mu} v, \\ \text{(One-Side)} \quad \hat{\nabla}_{1\text{-side}} f(x) &= \frac{f(x + \mu v) - f(x)}{\mu} v, \end{aligned}$$

450 requiring two queries [Shamir, 2017, Nesterov and Spokoiny, 2017]. This construction approximates  
 451 the directional derivative [Chen, 2020]. Their expectation exactly matches the gradient of a smoothed  
 452 function  $\nabla_x f_\mu(x)$  [Nesterov and Spokoiny, 2017] and maintains a  $\mathcal{O}(\mu)$ -level error [Ma and Huang,  
 453 2025]. Variance is significantly lower than one-point methods, often scaling linearly with dimension  
 454  $d$  [Duchi et al., 2015, Berahas et al., 2022].

**Multiple-Point Zeroth-Order Estimator** Multiple-point estimators use more than two function  
 evaluations to further enhance gradient estimate quality. Common strategies include Finite-Difference  
 method [Dai, 2015] or mini-batch averaging [Duchi et al., 2015]. The finite-difference method  
 approximates the gradient using finite differences along each standard basis direction:

$$\text{(Finite-Difference)} \quad \hat{\nabla}_{\text{fin-diff}} f(x) = \sum_{i=1}^d \frac{f(x + \mu e_i) - f(x - \mu e_i)}{\mu} e_i,$$

requiring  $2d$  queries, where  $e_i$  is the  $i$ -th coordinate vector. Mini-batch averaging reduces variance  
 by averaging  $b$  independent two-point estimates:

$$\text{(Mini-Batch)} \quad \hat{\nabla}_{\text{batch}} f(x) = \sum_{i=1}^b \frac{f(x + \mu v_i) - f(x - \mu v_i)}{\mu} v_i,$$

455 The finite-difference method offers low intrinsic variance but high query cost. Mini-batching reduces  
 456 base estimator variance by  $1/b$  at a cost of  $b$  or  $2b$  queries. These multi-point approaches can be  
 457 combined arbitrary directional derivative estimators.

## 458 A.2 Zeroth-Order SGD and Its Variants

459 **Vanilla Zeroth-Order SGD** The convergence of SGD has been extensively studied under various  
 460 settings. Ghadimi and Lan [2013] established complexity results for computing approximate solutions  
 461 using first-order and zeroth-order (gradient-free) information with Gaussian smoothing. For smooth  
 462 convex objective functions, Duchi et al. [2015] obtained the optimal convergence upper bound for  
 463 SGD under the zeroth-order optimization (ZOO) setting. Nesterov and Spokoiny [2017] provided the  
 464 optimal convergence upper bound for Gaussian smoothing. In the realm of nonconvex optimization,  
 465 Ji et al. [2019] proposed two new zeroth-order variance-reduced optimization algorithms, ZO-SVRG-  
 466 Coord-Rand and ZO-SPIDER-Coord, and provided improved analysis for the existing ZO-SVRG-  
 467 Coord algorithm. These methods achieved better convergence rates and function query complexities  
 468 than previous approaches. Berahas et al. [2022] derived convergence analyses for finite differences,  
 469 linear interpolation, Gaussian smoothing, and uniform sphere smoothing methods. Recent studies  
 470 have focused on non-smooth settings. Davis et al. [2022] and Zhang et al. [2020] established the  
 471 sample complexity for Lipschitz functions without assuming smoothness. Lin et al. [2022] derived the  
 472 complexity upper bound of SGD while noting a  $\sqrt{d}$  scale compared to the smooth setting. Notably,  
 473 Rando et al. [2024a] and Kornowski and Shamir [2024] revealed that by applying certain techniques,  
 474 the non-smooth case is not inherently more challenging than the smooth case.

475 **Variance-Reduced Zeroth-Order SGD** A key bottleneck in vanilla zeroth-order SGD is the high  
 476 variance of gradient estimators, which arises from both stochastic data sampling and the inherent  
 477 randomness in the gradient estimation process. This high variance necessitates small stepsizes,  
 478 leading to slow convergence [Liu et al., 2020]. To address the variance from stochastic data sampling,  
 479 variance reduction techniques—originally developed for first-order methods [Fang et al., 2018,  
 480 Defazio et al., 2014, Johnson and Zhang, 2013, Nguyen et al., 2017], have been adapted to the  
 481 zeroth-order setting. Algorithms such as ZO-SVRG [Liu et al., 2018, Huang et al., 2019, Gu et al.,



2021], ZO-SVRG/SPIDER-Coord [Ji et al., 2019], and ZO-SPIDER/SARAH [Fang et al., 2018, Ji et al., 2019, Chen et al., 2023] leverage epoch-based updates with variance-reducing correction terms or recursive estimator refinements. These methods significantly improve convergence by reducing the iteration complexity.

**Memory-Efficient Zeroth-Order SGD** Standard SGD typically requires storing all intermediate gradient across layers to enable chain-rule-based backpropagation, which incurs substantial memory overhead, especially when training large models. To alleviate this, MeZO [Malladi et al., 2023] introduces a memory-efficient approach wherein it suffices to store the random seed used to generate the perturbation vector for each layer, dramatically reducing memory consumption. This principle motivates algorithms such as Addax [Li et al., 2024], ElasticZO [Sugiura and Matsutani, 2025], and ZO2 [Wang et al., 2025], along with related benchmarking efforts [Zhang et al., 2024, Gautam et al., 2024, Wang et al., 2024, Guo et al., 2024]. Additional strategies exploit sparsity to further reduce memory usage; notable examples include ZORO [Cai et al., 2022b], the Extreme Sparsity framework [Guo et al., 2024], and the One-Bit method [Cai et al., 2022a].

## B Bias Analysis

### B.1 Absolute Convergence

In this subsection, we derive a sufficient condition to guarantee the expectation representation of the telescoping series introduced in Eq. (5). This requires ensuring the series is absolutely convergent, a property essential for interpreting it as the expectation of a well-defined random variable. The following definitions are directly taken from Folland [2002]:

**Definition B.1** (Convergent series). A series  $\sum_{n=1}^{\infty} a_n$  is said to be *convergent* if the sequence of partial sums  $S_N = \sum_{n=1}^N a_n$  is a convergent sequence; that is,  $\lim_{N \rightarrow \infty} S_N$  exists.

**Definition B.2** (Absolutely convergent series). A series  $\sum_{n=1}^{\infty} a_n$  is said to be *absolutely convergent* if the series  $\sum_{n=1}^{\infty} |a_n|$  is convergent.

The following classical result, known as the Riemann series theorem [Riemann, 1868, Spivak, 2008], highlights the necessity of absolute convergence when interpreting an infinite sum as a well-defined value.

**Theorem B.3** (Riemann Series Theorem). Let  $\sum_{n=1}^{\infty} a_n$  be a conditionally convergent series of real numbers (i.e., convergent but not absolutely convergent). Then, for any real number  $r \in \mathbb{R}$ , there exists a rearrangement  $\sigma : \mathbb{N} \rightarrow \mathbb{N}$  such that  $\sum_{n=1}^{\infty} a_{\sigma(n)} = r$ . Moreover, there exist rearrangements such that the sum diverges to  $+\infty$ ,  $-\infty$ , or fails to converge at all.

This theorem underscores the critical distinction between conditional and absolute convergence: a convergent series may yield different values under different summation orders. However, the definition of expectation for a random variable does not permit such ambiguity, since the outcomes have no inherent order. To guarantee a well-defined expectation, absolute convergence is required: that is, for a random variable  $X$  with outcomes  $\{x_n\}$  and probabilities  $\{p_n\}$ , it must hold that  $\mathbb{E}|X| = \sum_{n=1}^{\infty} |x_n|p_n < \infty$ .

We now recap Proposition 2.1 describing the condition where the telescoping series is absolutely convergent, enabling a valid expectation representation.

**Proposition B.4.** If the second-order continuously differentiable function  $f : \mathbb{R}^d \rightarrow \mathbb{R}$  has  $L$ -Lipschitz continuous gradient and  $\sum_{n=1}^{\infty} \mu_n < \infty$ , then the series

$$\sum_{n=1}^{\infty} p_n \left[ \frac{f(x + \mu_1 v) - f(x)}{\mu_1} + \frac{1}{p_n} \left( \frac{f(x + \mu_{n+1} v) - f(x)}{\mu_{n+1}} - \frac{f(x + \mu_n v) - f(x)}{\mu_n} \right) \right]$$

is absolutely convergent and its limit is  $\nabla_v f(x)$ .

*Proof.* First, because  $\sum_{n=1}^{\infty} |a_n + b_n| \leq \sum_{n=1}^{\infty} |a_n| + \sum_{n=1}^{\infty} |b_n|$ , it suffices to prove

$$\sum_{n=1}^{\infty} \left( \frac{f(x + \mu_{n+1} v) - f(x)}{\mu_{n+1}} - \frac{f(x + \mu_n v) - f(x)}{\mu_n} \right)$$

is absolutely convergent. To prove its absolute convergence, we estimate the magnitude of the difference term using Taylor's theorem:

$$\begin{aligned} & \left| \frac{f(x + \mu_{n+1}v) - f(x)}{\mu_{n+1}} - \frac{f(x + \mu_n v) - f(x)}{\mu_n} \right| \\ & \stackrel{(i)}{\leq} \left| \frac{\mu_{n+1} \nabla f(x)^\top v + R(x) \mu_{n+1}^2}{\mu_{n+1}} - \frac{\mu_n \nabla f(x)^\top v + R'(x) \mu_n^2}{\mu_n} \right| \\ & \stackrel{(ii)}{\leq} \frac{L}{2} |\mu_{n+1} + \mu_n| \end{aligned}$$

where (i) applies the Taylor theorem [Folland, 2002] with setting the integral form remainder  $R(x) := \int_0^1 (1-t) \sum_{|\alpha|=2} \frac{\partial^2}{\partial x_1^{\alpha_1} \dots \partial x_d^{\alpha_d}} f(x + t\mu v) dt$ , (ii) assumes the global Lipschitz continuous gradient, which results in the uniform estimate  $R(x) \leq \frac{L}{2}$  for all  $x \in \mathbb{R}^d$ . Therefore, to ensure the telescoping series is absolutely continuous, it suffices to require  $\sum_{n=1}^{\infty} \mu_n < \infty$ . The limit is directly determined by the original convergent series. It concludes our proof.  $\square$

In the following two examples, we present commonly used sequences  $\{\mu_n\}$  that satisfy the condition  $\sum_{n=1}^{\infty} \mu_n < \infty$ , ensuring the absolute convergence required in Proposition B.4.

**Example B.5** (Exponential Decay). Let  $\mu_n = \alpha^n$  for some constant  $0 < \alpha < 1$ . Then,

$$\sum_{n=1}^{\infty} \mu_n = \sum_{n=1}^{\infty} \alpha^n = \frac{\alpha}{1-\alpha} < \infty.$$

**Example B.6** (Polynomial Decay). Let  $\mu_n = \frac{1}{n^s}$  for some constant  $s > 1$ . Then,

$$\sum_{n=1}^{\infty} \mu_n = \sum_{n=1}^{\infty} \frac{1}{n^s} < \infty,$$

which is well-known as the Riemann zeta function  $\zeta(s)$ .

## B.2 Unbiasedness of Zeroth-Order Estimators in $\mathcal{P}$ -Family

We begin by recalling the definition of the unbiased zeroth-order gradient estimators, denoted by  $\mathcal{P} := \mathcal{P}(f, \{\mu_n\}_{n=1}^{\infty}, \{p_n\}_{n=1}^{\infty}, V)$ , as given by Definition 2.2. Under suitable conditions on the differentiable function  $f : \mathbb{R}^d \rightarrow \mathbb{R}$  and the sequence  $\{\mu_n\}_{n=1}^{\infty}$  (e.g., those provided by Proposition 2.1), this definition naturally yields the desired expectation representation. Moreover, the random distributions  $\{p_n\}_{n=1}^{\infty}$  and  $V$  are independent. These conditions are sufficient to guarantee the unbiasedness stated in the following result.

**Theorem B.7** (Unbiasedness). *Let  $\mathcal{P} := \mathcal{P}(f, \{\mu_n\}_{n=1}^{\infty}, \{p_n\}_{n=1}^{\infty}, V)$  is defined as Definition 2.2. Then, for any estimator  $P(n, v) \in \mathcal{P}$ , the following hold:*

(a)  $\mathbb{E}[P(n, v) \mid v] = \nabla_v f(x)$ ; that is,  $P(n, v)$  is an unbiased estimator of the directional derivative  $\nabla_v f(x)$ .

(b) If the random direction  $v$  is chosen independently of the sampling  $n \sim \{p_n\}_{n=1}^{\infty}$  and satisfies  $\mathbb{E}[v v^\top] = I$ , then

$$\mathbb{E}_{n \sim \{p_n\}_{n=1}^{\infty}, v \sim V} [P(n, v) v] = \nabla f(x),$$

so that  $P(n, v) v$  is an unbiased estimator of the full gradient.

*Proof.* By Definition 2.2, the directional derivative  $\nabla_v f(x)$  naturally has the expectation representation.

(a) Denote

$$X_n := \frac{f(x + \mu_1 v) - f(x)}{\mu_1} + \frac{1}{p_n} \left( \frac{f(x + \mu_{n+1} v) - f(x)}{\mu_{n+1}} - \frac{f(x + \mu_n v) - f(x)}{\mu_n} \right).$$

Then by the tower property of the conditional expectation,  
 $\nabla_v f(x) = \mathbb{E}_{n \sim \{p_n\}_{n=1}^{\infty}} [X_n | v] = \mathbb{E}_{n \sim \{p_n\}_{n=1}^{\infty}} [\mathbb{E}[P(n, v) | n] | v] = \mathbb{E}[P(n, v) | v].$   
 It concludes the proof.

(b) We consider the conditional expectation  $\mathbb{E}[\cdot | v]$ . We have

$$\begin{aligned} \mathbb{E}[P(n, v) v] &= \mathbb{E}[\mathbb{E}[P(n, v) v | v]] \\ &= \mathbb{E}[\mathbb{E}[P(n, v) | v] v] \\ &= \mathbb{E}[\nabla_v f(x) v] \\ &= \nabla f(x) \end{aligned}$$

Therefore, we conclude that  $P(n, v)v$  is an unbiased estimator of the gradient  $\nabla f(x)$ .

□

## C Variance Analysis

In this section we present the proof of [Theorem 3.1](#). Each subsection contains the proof of the corresponding item. We recap its statement below:

**Theorem C.1.** Let  $\mathcal{P} := \mathcal{P}(f, \{\mu_n\}_{n=1}^{\infty}, \{p_n\}_{n=1}^{\infty}, V)$  is defined as [Definition 2.2](#). Suppose that  $f : \mathbb{R}^d \rightarrow \mathbb{R}$  is second-order continuously differentiable and has  $L$ -Lipschitz continuous gradient,  $\sum_{n=1}^{\infty} \mu_n < \infty$ , and  $V$  is the uniform distribution over the sphere with the radius  $\sqrt{d}$ . Define

$$\mu := \mu_1, \quad \varrho := \sum_{n=1}^{\infty} \frac{(\mu_{n+1} - \mu_n)^2}{p_n}, \quad \text{and} \quad \varphi := \sum_{n=1}^{\infty} \frac{\mu_n^2}{p_n}.$$

Then the following statements hold:

(a) If there exists a point  $x \in \mathbb{R}^d$  such that the Hessian  $\nabla^2 f(x)$  is positive definite and  $f(x) \neq 0$ , then the variances of the  $P_1$  is infinite. That is,

$$\text{Var}[P_1(n, v)v] = +\infty.$$

(b) The variance of  $P_2$ -estimator  $P_2(n, v)v$  is given by

$$\text{Var}[P_2(n, v) v] \leq \text{Var}[P_4(n, v) v] + \frac{L^2}{3} d^3 \mu^2 + \frac{L^2}{12} d^3 \varrho + \frac{L^2}{3} d^3 \varphi.$$

(c) The variance of  $P_3$ -estimator  $P_3(n, v)v$  is given by

$$\text{Var}[P_3(n, v)v] \leq \text{Var}[P_4(n, v) v] + \frac{L^2}{8} d^3 \mu^2 + \frac{L^2}{8} d^3 \varrho.$$

(d) The variance of  $P_4$ -estimator  $P_4(n, v)v$  is given by

$$\text{Var}[P_4(n, v)v] \leq (d-1) \|\nabla f(x)\|^2 + \frac{3L^2}{4} d^3 \mu^2 + \frac{L^2 d^3}{2} \varrho.$$

*Proof.* For the item (a), we present the proof in [Lemma C.2](#). For arbitrary  $P := P(n, v) \in \mathcal{P}$ , we have

$$\begin{aligned} \text{Var}[P v] &\stackrel{(i)}{=} \mathbb{E}[P^2 v^\top v] - \|\nabla f(x)\|^2 \\ &= d \mathbb{E}[(P - P_4(n, v) + P_4(n, v))^2] - \|\nabla f(x)\|^2 \\ &\stackrel{(ii)}{=} d \mathbb{E}[(P - P_4(n, v))^2] + d \mathbb{E}[P_4(n, v)] - \|\nabla f(x)\|^2 \\ &= d \mathbb{E}[(P - P_4(n, v))^2] + \text{Var}[P_4(n, v) v] \end{aligned}$$

where (i) applies the unbiasedness ([Theorem 2.3](#)) and (ii) applies the definition of  $\mathcal{P}$  ( $P$  is an unbiased estimator of  $P_4$ ). Therefore, we start with  $\text{Var}[P_4 v]$ , the variance of the  $P_4$ -estimator. Then it suffices to evaluate  $\mathbb{E}[(P_k(n, v) - P_4(n, v))^2]$  for  $k = 2$  and  $k = 3$ . Therefore, we prove the item (d) first. The detailed proof is included in [Lemma C.3](#). Based on this result, we obtain the variance upper bound of  $P_2$ - and  $P_3$ -estimators in [Lemma C.4](#) and [Lemma C.5](#), respectively. □

## 570 C.1 Variance of $P_1$ -Estimator

571 **Lemma C.2.** *Under the same setting as Theorem C.1, if there exists a point  $x \in \mathbb{R}^d$  such that the*  
 572 *Hessian  $\nabla^2 f(x)$  is positive definite, then the variances of the  $P_1$ -estimator at  $x$  is infinite.*

573 *Proof.* Recall that for the random direction  $\frac{1}{\sqrt{d}}v \sim \text{Uniform}(\mathbb{S}^{d-1})$  and the random variable  $U_4 \sim$   
 574  $\text{Uniform}(\{0, 1, 2, 3\})$ , we have the  $P_1$ -estimator defined as

$$P_1(n, v) = \frac{f(x + \mu_1 v)\mathbb{I}_{\{U_4=1\}} - f(x)\mathbb{I}_{\{U_4=0\}}}{\mu_1} + \frac{1}{p_n} \left[ \frac{f(x + \mu_{n+1} v)\mathbb{I}_{\{U_4=2\}} - f(x)\mathbb{I}_{\{U_4=0\}}}{\mu_{n+1}} - \frac{f(x + \mu_n v)\mathbb{I}_{\{U_4=3\}} - f(x)\mathbb{I}_{\{U_4=0\}}}{\mu_n} \right].$$

575 Since this estimator is unbiased (Theorem 2.3),

$$\text{Var}[P_1(n, v)] = d\mathbb{E}[P_1(n, v)^2] - \|\nabla f(x)\|^2,$$

576 so it suffices to show  $\mathbb{E}[P_1(n, v)^2] = \infty$ . For brevity we write

$$P_1 := P_1(n, v).$$

577 As the Hessian  $\nabla^2 f(x)$  is positive definite at the point  $x$ , it has  $\nabla^2 f(x) \geq \lambda_{\min} I$  for some  $\lambda_{\min} > 0$ .  
 578 We consider the event  $\{N = n, U_3 = 3\}$ , one finds

$$P_1 = -\frac{f(x + \mu_n v)}{p_n \mu_n} \quad \text{with probability } p_n \cdot \frac{1}{4}.$$

579 Hence

$$\begin{aligned} \mathbb{E}_{n \sim \{p_n\}}[P_1^2] &\geq \sum_{n=1}^{\infty} \Pr(N = n, U_3 = 3) \left( \frac{f(x + \mu_n v)}{p_n \mu_n} \right)^2 \\ &\geq \frac{1}{3} \sum_{n=1}^{\infty} \frac{[f(x + \mu_n v)]^2}{p_n \mu_n^2} \\ &\geq \frac{1}{3} \sum_{n=1}^{\infty} \left( \frac{[f(x)]^2}{p_n \mu_n^2} + \frac{[f(x + \mu_n v) - f(x)] f(x)}{p_n \mu_n^2} \right) \end{aligned}$$

Without loss of generality, we assume  $f(x) > 0$ . In the case  $f(x) < 0$ , we apply the  $L$ -smoothness to obtain a lower bound instead. By the second-order Taylor expansion [Spivak, 2008] (or the strong convexity near the point  $x$ ),

$$f(x + \mu v) \geq f(x) + \mu \nabla f(x)^\top v + \frac{1}{2} \mu^2 \lambda_{\min} v^\top v.$$

so we have

$$\frac{[f(x + \mu_n v) - f(x)] f(x)}{p_n \mu_n^2} \geq \frac{\nabla f(x)^\top v}{p_n \mu_n} + \frac{d\lambda_{\min} f(x)}{2p_n}.$$

580 As the result, we have

$$\mathbb{E}_{n \sim \{p_n\}, \frac{1}{\sqrt{d}}v \sim \text{Uniform}(\mathbb{S}^{d-1})}[P_1^2] \geq \frac{1}{3} \sum_{n=1}^{\infty} \frac{1}{p_n} \left( \frac{f(x)^2}{\mu_n^2} + \frac{d\lambda_{\min} f(x)}{2p_n} \right).$$

581 As  $\{p_n\}$  is a PMF, it must diverge to infinite. □

## 582 C.2 Variance of $P_4$ -Estimator

583 **Lemma C.3.** *Under the same setting as Theorem C.1, the variance of  $P_4$ -estimator  $P_4(n, v)$  is*  
 584 *upper bounded by*

$$\text{Var}[P_4(n, v)] \leq (d-1)\|\nabla f(x)\|^2 + \frac{3L^2 d^3 \mu_1^2}{4} + \frac{L^2 d^3}{2} \sum_{n=1}^{\infty} \frac{|\mu_{n+1} - \mu_n|^2}{p_n}.$$

585 *Proof.* Recall that

$$P_4(n, v) = \frac{f(x + \mu_1 v) - f(x)}{\mu_1} + \frac{1}{p_n} \left[ \frac{f(x + \mu_{n+1} v) - f(x)}{\mu_{n+1}} - \frac{f(x + \mu_n v) - f(x)}{\mu_n} \right].$$

586 Our goal is to bound  $\text{Var}[P_4(n, v) v]$ . For each  $n$ , define the remainder term

$$\begin{aligned} \delta_n(v) &= \frac{f(x + \mu_n v) - f(x) - \mu_n \nabla f(x)^\top v}{\mu_n}, \\ \Delta_n &= \frac{f(x + \mu_n v) - f(x)}{\mu_n} = \delta_n(v) + \nabla f(x)^\top v. \end{aligned}$$

587 Then

$$P_4(n, v) = \nabla f(x)^\top v + \delta_1(v) + \frac{\delta_{n+1}(v) - \delta_n(v)}{p_n}.$$

588 Hence our vector estimator is

$$P_4(n, v) v = v v^\top \nabla f(x) + \left[ \delta_1(v) + \frac{\delta_{n+1}(v) - \delta_n(v)}{p_n} \right] v.$$

589 Since we have shown that  $P_4(n, v) v$  is unbiased (Theorem 2.3) and  $\mathbb{E}[v v^\top] = I_d$ , we have

$$\mathbb{E} \left[ \delta_1(v) + \frac{\delta_{n+1}(v) - \delta_n(v)}{p_n} \right] v = 0. \quad (11)$$

590 The variance is given by

$$\begin{aligned} \text{Var}[P_4(n, v) v] &= d \mathbb{E}[P_4(n, v)^2] - \|\nabla f(x)\|^2 \\ &= (d-1) \|\nabla f(x)\|^2 + d \mathbb{E} \left( \delta_1(v) + \frac{\delta_{n+1}(v) - \delta_n(v)}{p_n} \right)^2 \\ &\quad + 2d \mathbb{E} \nabla f(x)^\top v \left( \delta_1(v) + \frac{\delta_{n+1}(v) - \delta_n(v)}{p_n} \right) \\ &\stackrel{(i)}{=} (d-1) \|\nabla f(x)\|^2 + d \mathbb{E} \left( \delta_1(v) + \frac{\delta_{n+1}(v) - \delta_n(v)}{p_n} \right)^2 \\ &= (d-1) \|\nabla f(x)\|^2 + d \mathbb{E} \delta_1^2(v) \\ &\quad + 2d \mathbb{E} \left[ \frac{\delta_1(v)}{p_n} (\delta_{n+1}(v) - \delta_n(v)) \right] + \mathbb{E} \left[ \frac{d}{p_n^2} (\delta_{n+1}(v) - \delta_n(v))^2 \right] \\ &\stackrel{(ii)}{=} (d-1) \|\nabla f(x)\|^2 + 3d \mathbb{E} \delta_1^2(v) + \mathbb{E} \left[ \frac{d}{p_n^2} (\delta_{n+1}(v) - \delta_n(v))^2 \right] \end{aligned}$$

591 where (i) applies the unbiasedness Eq. (11) and (ii) applies the telescoping series Eq. (2). Now it  
592 remains to upper bound the remainder term  $\delta_n(v)$  and the remainder difference term  $\delta_{n+1}(v) - \delta_n(v)$ .

593 • **Bound the remainder term  $\delta_n(v)$ :** By  $L$ -smoothness of  $f : \mathbb{R}^d \rightarrow \mathbb{R}$ , we have

$$\begin{aligned} f(x + \mu_n v) - f(x) &\leq \mu_n \nabla f(x)^\top v + \frac{L \mu_n^2}{2} \|v\|^2, \\ &\stackrel{(i)}{=} \mu_n \nabla f(x)^\top v + \frac{d L \mu_n^2}{2}, \end{aligned}$$

594 where (i) applies  $\mathbb{E} v v^\top = I_d$  (this condition ensures that  $\|v\|^2 = \text{Tr}(\|v\|^2) = \text{Tr}(v v^\top) =$   
595  $d$ ). As the result,

$$\delta_n(v) \leq \frac{Ld}{2} \mu_n. \quad (12)$$

596 or we may use the following almost-sure upper bound

$$[\delta_n(v)]^2 \leq \frac{L^2 d^2}{4} \mu_n^2.$$

- **Bound the remainder difference term  $\delta_{n+1}(v) - \delta_n(v)$ :** We define the remainder term as a function in  $\mu$ ; that is,

$$\phi(\mu) := \frac{f(x + \mu v) - f(x) - \mu \nabla f(x)^\top v}{\mu}.$$

597

It automatically gives

$$\delta_{n+1}(v) - \delta_n(v) = \phi(\mu_{n+1}) - \phi(\mu_n).$$

As  $\phi : [\mu_{n+1}, \mu_n] \rightarrow \mathbb{R}$  is a continuous differentiable function (by our assumption that  $f : \mathbb{R}^d \rightarrow \mathbb{R}$  is second-order continuously differentiable), we can apply the mean-value theorem [Folland, 2002]: There exists  $\varsigma \in [\mu_{n+1}, \mu_n]$  such that

$$\phi(\mu_{n+1}) - \phi(\mu_n) = \phi'(\varsigma)(\mu_{n+1} - \mu_n).$$

598

We again applying the  $L$ -smoothness of  $f : \mathbb{R}^d \rightarrow \mathbb{R}$  (essentially the bounded Hessian assumption) to  $\phi'(\varsigma)$ , which leads to

599

$$|\delta_{n+1}(v) - \delta_n(v)| \leq \frac{Ld}{2} |\mu_{n+1} - \mu_n|. \quad (13)$$

600 As the result, we obtain the upper bound as

$$\begin{aligned} \text{Var}[\mathbf{P}_4(n, v)] &\stackrel{(i)}{\leq} (d-1) \|\nabla f(x)\|^2 + \frac{3L^2 d^3 \mu_1^2}{4} + \sum_{n=1}^{\infty} \frac{2d}{p_n} \left( \frac{Ld}{2} |\mu_{n+1} - \mu_n| \right)^2 \\ &\leq (d-1) \|\nabla f(x)\|^2 + \frac{3L^2 d^3 \mu_1^2}{4} + \frac{L^2 d^3}{2} \sum_{n=1}^{\infty} \frac{|\mu_{n+1} - \mu_n|^2}{p_n}, \end{aligned}$$

601

where (i) applies the expectation over  $n \sim \{p_n\}_{n=1}^{\infty}$ , which cancels out one  $\frac{1}{p_n}$ .  $\square$

### 602 C.3 Variance of $\mathbf{P}_2$ -Estimator

603 **Lemma C.4.** Under the same setting as Theorem C.1, the variance of  $\mathbf{P}_2$ -estimator  $\mathbf{P}_2(n, v)$  is  
604 upper bounded by

$$\text{Var}[\mathbf{P}_2(n, v)] \leq \text{Var}[\mathbf{P}_4(n, v)] + \frac{L^2}{12} d^3 \sum_{n=1}^{\infty} \frac{(\mu_n - \mu_{n+1})^2}{p_n} + \frac{L^2}{3} d^3 \mu_1^2 + \frac{L^2}{3} d^3 \sum_{n=1}^{\infty} \frac{\mu_n^2}{p_n}.$$

605 *Proof.* Recall that  $\mathbf{P}_2(n, v)$  is defined as

$$\begin{aligned} \mathbf{P}_2(n, v) &= \frac{f(x + \mu_1 v) - f(x)}{\mu_1} \mathbb{I}_{\{U_3=0\}} \\ &\quad + \frac{1}{p_n} \left[ \frac{f(x + \mu_{n+1} v) - f(x)}{\mu_{n+1}} \mathbb{I}_{\{U_3=1\}} - \frac{f(x + \mu_n v) - f(x)}{\mu_n} \mathbb{I}_{\{U_3=2\}} \right], \end{aligned}$$

606 where  $U_3 \sim \text{Uniform}(\{0, 1, 2\})$  is a selection variable. Then

$$\begin{aligned} &\mathbb{E}[(\mathbf{P}_2(n, v) - \mathbf{P}_4(n, v))^2 | n, v] \\ &= \mathbb{P}(U_3 = 0) \left[ \frac{1}{p_n} \left[ \frac{f(x + \mu_{n+1} v) - f(x)}{\mu_{n+1}} - \frac{f(x + \mu_n v) - f(x)}{\mu_n} \right] \right]^2 \\ &\quad + \mathbb{P}(U_3 = 1) \left[ \frac{f(x + \mu_1 v) - f(x)}{\mu_1} + \frac{1}{p_n} \left[ -\frac{f(x + \mu_n v) - f(x)}{\mu_n} \right] \right]^2 \\ &\quad + \mathbb{P}(U_3 = 2) \left[ \frac{f(x + \mu_1 v) - f(x)}{\mu_1} + \frac{1}{p_n} \left[ \frac{f(x + \mu_{n+1} v) - f(x)}{\mu_{n+1}} \right] \right]^2 \end{aligned}$$



$$\begin{aligned}
&\stackrel{(i)}{\leq} \frac{1}{3} \frac{1}{p_n^2} (\delta_{n+1}(v) - \delta_n(v))^2 + \frac{2}{3} \left( [\delta_1(v)]^2 + \frac{1}{p_n^2} [\delta_n(v)]^2 \right) + \frac{2}{3} \left( [\delta_1(v)]^2 + \frac{1}{p_n^2} [\delta_{n+1}(v)]^2 \right) \\
&= \frac{4}{3} [\delta_1(v)]^2 + \frac{1}{3} \frac{1}{p_n^2} (\delta_{n+1}(v) - \delta_n(v))^2 + \frac{2}{3} \frac{1}{p_n^2} [\delta_n(v)]^2 + \frac{2}{3} \frac{1}{p_n^2} [\delta_{n+1}(v)]^2,
\end{aligned}$$

607 where (i) applies  $(a + b)^2 \leq 2a^2 + 2b^2$  and  $\delta_n(v) := \frac{f(x+\mu_n v) - f(x) - \mu_n \nabla f(x)^\top v}{\mu_n}$ . As we have  
608 bounded this term in [Lemma C.3](#), we have

$$\begin{aligned}
&\mathbb{E}[(P_2(n, v) - P_4(n, v))^2 \mid v] \\
&= \sum_{n=1}^{\infty} p_n [(P_2(n, v) - P_4(n, v))^2 \mid n, v] \\
&\leq \sum_{n=1}^{\infty} p_n \left[ \frac{L^2 d^2}{3} \mu_1^2 + \frac{L^2 d^2}{12} \frac{(\mu_n - \mu_{n+1})^2}{p_n^2} + \frac{L^2 d^2}{3 p_n^2} \mu_n^2 \right] \\
&\leq \frac{L^2}{12} d^2 \sum_{n=1}^{\infty} \frac{(\mu_n - \mu_{n+1})^2}{p_n} + \frac{L^2}{3} d^2 \mu_1^2 + \frac{L^2}{3} d^2 \sum_{n=1}^{\infty} \frac{\mu_n^2}{p_n}.
\end{aligned}$$

609 Therefore, we finally obtain

$$\begin{aligned}
&\text{Var}[P_2(n, v) \mid v] = d \mathbb{E}[(P_2(n, v) - P_4(n, v))^2] + \text{Var}[P_4(n, v) \mid v] \\
&\leq \text{Var}[P_4(n, v) \mid v] + \frac{L^2}{12} d^3 \sum_{n=1}^{\infty} \frac{(\mu_n - \mu_{n+1})^2}{p_n} + \frac{L^2}{3} d^3 \mu_1^2 + \frac{L^2}{3} d^3 \sum_{n=1}^{\infty} \frac{\mu_n^2}{p_n}.
\end{aligned}$$

610 It completes the proof.  $\square$

#### 611 C.4 Variance of $P_3$ -Estimator

612 **Lemma C.5.** *Under the same setting as [Theorem C.1](#), the variance of  $P_3$ -estimator  $P_3(n, v) \mid v$  is*  
613 *upper bounded by*

$$\text{Var}[P_3(n, v) \mid v] \leq \text{Var}[P_4(n, v) \mid v] + \frac{L^2}{8} d^3 \sum_{n=1}^{\infty} \frac{(\mu_n - \mu_{n+1})^2}{p_n} + \frac{L^2}{8} d^3 \mu_1^2.$$

614 *Proof.* Recall that  $P_3(n, v)$  is defined as

$$\begin{aligned}
&P_3(n, v) \\
&= \frac{f(x + \mu_1 v) - f(x)}{\mu_1} U_2 + \frac{1}{p_n} \left[ \frac{f(x + \mu_{n+1} v) - f(x)}{\mu_{n+1}} - \frac{f(x + \mu_n v) - f(x)}{\mu_n} \right] (1 - U_2),
\end{aligned}$$

615 where  $U_2 \sim \text{Uniform}(\{0, 1\})$  is a selection variable. Then

$$\begin{aligned}
&\mathbb{E}[(P_3(n, v) - P_4(n, v))^2 \mid n, v] \\
&= \mathbb{P}(U_2 = 0) \left[ \frac{1}{p_n} \left[ \frac{f(x + \mu_{n+1} v) - f(x)}{\mu_{n+1}} - \frac{f(x + \mu_n v) - f(x)}{\mu_n} \right] - P_4(n, v) \right]^2 \\
&\quad + \mathbb{P}(U_2 = 1) \left[ \frac{f(x + \mu_1 v) - f(x)}{\mu_1} - P_4(n, v) \right]^2 \\
&= \frac{1}{2} \left[ \frac{1}{p_n} \left[ \frac{f(x + \mu_{n+1} v) - f(x)}{\mu_{n+1}} - \frac{f(x + \mu_n v) - f(x)}{\mu_n} \right] \right]^2 + \frac{1}{2} \left[ \frac{f(x + \mu_1 v) - f(x)}{\mu_1} \right]^2.
\end{aligned}$$

616 As we have bounded this term in [Lemma C.3](#), we have

$$\mathbb{E}[(P_3(n, v) - P_4(n, v))^2 \mid v] = \sum_{n=1}^{\infty} p_n [(P_3(n, v) - P_4(n, v))^2 \mid n, v]$$

$$\begin{aligned}
&\leq \sum_{n=1}^{\infty} p_n \left[ \frac{1}{p_n^2} \frac{L^2 d^2}{8} |\mu_{n+1} - \mu_n|^2 + \frac{L^2 d^2 \mu_1^2}{8} \right] \\
&\leq \frac{L^2}{8} d^2 \sum_{n=1}^{\infty} \frac{(\mu_n - \mu_{n+1})^2}{p_n} + \frac{L^2}{8} d^2 \mu_1^2.
\end{aligned}$$

Therefore, we finally obtain

$$\begin{aligned}
\text{Var}[\mathbf{P}_3(n, v) v] &= d\mathbb{E}[(\mathbf{P}_3(n, v) - \mathbf{P}_4(n, v))^2] + \text{Var}[\mathbf{P}_4(n, v) v] \\
&\leq \text{Var}[\mathbf{P}_4(n, v) v] + \frac{L^2}{8} d^3 \sum_{n=1}^{\infty} \frac{(\mu_n - \mu_{n+1})^2}{p_n} + \frac{L^2}{8} d^3 \mu_1^2.
\end{aligned}$$

It concludes the proof.  $\square$

### C.5 On the Optimal Sampling Distribution and the Perturbation Step Size Sequence

We recap the full statement of [Theorem 3.2](#).

**Theorem C.6.** Let  $\{\mu_n\}_{n=1}^{\infty}$  be a positive, decreasing sequence with  $\sum_{n=1}^{\infty} \mu_n < \infty$ , and let  $\{p_n\}_{n=1}^{\infty}$  be a PMF. Then the following statements hold:

(a) Define  $\varrho_n = \frac{(\mu_{n+1} - \mu_n)^2}{p_n}$ . The lower bound of  $\varrho$  is given by

$$\varrho = \sum_{n=1}^{\infty} \varrho_n \geq \mu_1^2.$$

Moreover, equality holds if and only if  $p_n = \frac{\mu_n - \mu_{n+1}}{\mu_1}$ .

(b) Define  $\varphi_n = \frac{\mu_n^2}{p_n}$ . The lower bound of  $\varphi$  is given by

$$\varphi = \sum_{n=1}^{\infty} \varphi_n \geq \left( \sum_{n=1}^{\infty} \mu_n \right)^2 > \mu_1^2.$$

Moreover, equality holds if and only if  $p_n = \frac{\mu_n}{\sum_{n=1}^{\infty} \mu_n}$ .

*Proof.* Write  $a_n = \mu_{n+1} - \mu_n$ , so  $\sum_{n=1}^{\infty} a_n = \mu_1$  and  $\sum_n p_n = 1$ . By Cauchy-Schwarz inequality,

$$\left( \sum_n |a_n| \right)^2 \leq \left( \sum_n p_n \right) \left( \sum_n \frac{a_n^2}{p_n} \right) = \sum_{n=1}^{\infty} \varrho_n,$$

which yields the claimed lower bound in (a). Equality occurs exactly when  $p_n \propto |a_n|$ , i.e.  $p_n = (\mu_n - \mu_{n+1})/\mu_1$ . Similarly, By Cauchy-Schwarz inequality,

$$\left( \sum_n \mu_n \right)^2 \leq \left( \sum_n \frac{\mu_n^2}{p_n} \right) \left( \sum_n p_n \right) = \sum_{n=1}^{\infty} \varphi_n,$$

which yields the claimed lower bound in (b).  $\square$

In the following example, we include the omitted details of [Example 3.4](#).

**Example C.7.** We consider the Zipf distribution  $n \sim \text{Zipf}(s)$  ( $s > 1$ ). Then

$$p_n = \frac{1}{\zeta(s)} \frac{1}{n^s}, \quad \zeta(s) = \sum_{n=1}^{\infty} \frac{1}{n^s}.$$

We define  $\{\mu_n\}$  by the recursion

$$\mu_n - \mu_{n+1} = \mu_1 p_n = \mu_1 \frac{1}{\zeta(s)} \frac{1}{n^s},$$

so that summing gives the closed-form

$$\mu_n = \mu_1 \left( 1 - \frac{\sum_{j=1}^{n-1} j^{-s}}{\zeta(s)} \right) = \mu_1 \frac{\sum_{j=n}^{\infty} j^{-s}}{\zeta(s)}.$$

A direct check shows this choice attains the lower bound  $\varrho = \mu_1^2$  on  $\sum (\mu_n - \mu_{n+1})^2 / p_n$ . Now we turn to bound  $\varphi$ :

$$\varphi = \sum_{n=1}^{\infty} \frac{\mu_n^2}{p_n} = \mu_1^2 \zeta(s) \sum_{n=1}^{\infty} n^s \left( 1 - \frac{\sum_{j=1}^{n-1} j^{-s}}{\zeta(s)} \right)^2 = \mu_1^2 \zeta(s) \sum_{n=1}^{\infty} n^s \left( \frac{\sum_{j=n}^{\infty} j^{-s}}{\zeta(s)} \right)^2.$$

For  $s > 3$ , use the integral bound

$$\sum_{j=n}^{\infty} j^{-s} \leq \int_{n-1}^{\infty} x^{-s} dx = \frac{(n-1)^{1-s}}{s-1},$$

to get

$$\frac{\mu_n^2}{p_n} \leq \frac{\mu_1^2}{(s-1)^2 \zeta(s)} n^{2-s}.$$

Since  $s > 3$  the series  $\sum_{n=1}^{\infty} n^{2-s} = \zeta(s-2)$  converges, giving the clean bound

$$\varphi = \sum_{n=1}^{\infty} \frac{\mu_n^2}{p_n} \leq \frac{\zeta(s-2)}{(s-1)^2 \zeta(s)} \mu_1^2.$$

## C.6 Discussions: Variance of Random Directional Derivative

In this subsection, we analyze the variance of a gradient estimate based on a random directional derivative. Let  $v$  be a random vector uniformly sampled from the sphere with the dimension  $d$ . We approximate the gradient  $\nabla f(x)$  using the random directional derivative defined as

$$\nabla_v f(x) := vv^\top \nabla f(x).$$

Assuming that the expectation satisfies  $\mathbb{E}[vv^\top] = I$ , it is essential to evaluate the variance of this estimator. Specifically, we compute:

$$\begin{aligned} \mathbb{E}[\nabla f(x)^\top vv^\top vv^\top \nabla f(x)] &= \mathbb{E}[\|\nabla f(x)\|^2 \|v\|^2] \\ &= d \|\nabla f(x)\|^2. \end{aligned}$$

Thus, the variance is given by

$$\text{Var}[\nabla_v f(x)] = d \|\nabla f(x)\|^2 - \|\nabla f(x)\|^2 = (d-1) \|\nabla f(x)\|^2.$$

This result indicates that even when the exact directional derivative is available, the variance still scales with  $\mathcal{O}(d)$  relative to the gradient norm. Consequently, it is not avoidable to remove the dependence on the dimension  $d$ .

## D Convergence Analysis

In this section, we present the proof of [Corollary 3.5](#). Recall that our goal is to solve the stochastic optimization problem [Eq. \(1\)](#):

$$\min_{x \in \mathbb{R}^d} f(x) := \mathbb{E}_{\xi \sim \Xi} f(x; \xi),$$

where the second-order continuously differentiable function  $f(\cdot; \xi) : \mathbb{R}^d \rightarrow \mathbb{R}$  has  $L$ -Lipschitz gradient for every  $\xi$ . We consider the convergence upper bound of the classical stochastic gradient descent (SGD) algorithm with the constant learning rate  $\eta$  given the initialization  $x_0$ :

$$x_{t+1} = x_t - \eta g(x_t), \tag{SGD}$$

where  $g(x_t)$  is an unbiased estimator of the full gradient  $\nabla f(x)$ .

## 653 D.1 The Convergence Upper Bound

654 The full statement of [Corollary 3.5](#) is given as follow:

**Corollary D.1.** *Consider the stochastic optimization problem in [Eq. \(1\)](#), and suppose that the individual loss  $f(x; \xi)$  is second-order differentiable with  $L$ -Lipschitz continuous gradient in  $x$ , uniformly over  $\xi \sim \Xi$ . Assume the stochastic gradient is approximated using the  $P_k$ -estimator  $P_k(n, v)$  for  $k = 2, 3, 4$ . Let the SGD iteration be defined as*

$$x_{t+1} = x_t - \eta P_k(n_t, v_t) v_t$$

where  $\eta \in (0, \frac{1}{L^2 d}]$  is the stepsize. Then the iterates satisfy the following convergence guarantee:

$$\min_{0 \leq t \leq T-1} \mathbb{E} \|\nabla f(x_t)\|^2 \leq L\eta [C_k d^3 \mu^2 + 2dL(f^* - \mathbb{E}_{\xi \sim \Xi} f_\xi^*)] + \frac{2}{\eta T} \underline{\delta},$$

655 where  $\underline{\delta} := f(x_0) - f^*$  and  $C_k = \begin{cases} \frac{28L^2}{12} & k = 2, \\ \frac{3L^2}{4} & k = 3, (k = 2, 3, 4) \text{ is the estimator-dependent} \\ \frac{5L^2}{4} & k = 4, \end{cases}$

656 error term. Consequently, choosing  $\eta = \Theta(1/\sqrt{dT})$  and  $\mu = \mathcal{O}(\frac{1}{d})$  yields the optimal complexity

657  $T = \Theta(\frac{d}{\epsilon^4})$  of having  $\min_{0 \leq t \leq T-1} \mathbb{E} \|\nabla f(x_t)\| \leq \epsilon$ .

*Proof.* Let  $g(x) = P_k(n, v)$  for  $k = 2, 3, 4$ . By [Lemma D.4](#), we have

$$\mathbb{E} \|g(x)\| \leq dL \|\nabla f(x)\|^2 + C_k d^3 \mu^2 + 2dL(f^* - \mathbb{E}_{\xi \sim \Xi} f_\xi^*).$$

Then we set  $B = dL$  and  $C = C_k d^3 \mu^2 + 2dL(f^* - \mathbb{E}_{\xi \sim \Xi} f_\xi^*)$  in [Lemma D.3](#). As the result, when  $\eta \leq \frac{1}{L^2 d}$ , we have

$$\min_{0 \leq t \leq T-1} \mathbb{E} \|\nabla f(x_t)\|^2 \leq L\eta [C_k d^3 \mu^2 + 2dL(f^* - \mathbb{E}_{\xi \sim \Xi} f_\xi^*)] + \frac{2}{\eta T} \underline{\delta}.$$

The complexity of making  $\min_{0 \leq t \leq T-1} \mathbb{E} \|\nabla f(x_t)\| \leq \epsilon$  is given by

$$T \geq \frac{12\delta L}{\epsilon^2} \max \left\{ dL, 2 \frac{C_k d^3 \mu^2 + 2dL(f^* - \mathbb{E}_{\xi \sim \Xi} f_\xi^*)}{\epsilon^2} \right\}.$$

658 Setting  $\mu = \mathcal{O}(\frac{1}{d})$ , the optimal complexity is given by  $T = \Theta(\frac{d}{\epsilon^4})$ . □

## 659 D.2 Supporting Lemmas

**Lemma D.2.** *Let  $f^* := \min_x f(x)$  and  $f_\xi^* := \min_x f(x; \xi)$ . If for each  $\xi$ ,  $f(x; \xi)$  has  $L$ -Lipschitz gradient, then*

$$\mathbb{E} \|\nabla f(x; \xi)\|^2 \leq L \|\nabla f(x)\|^2 + 2L(f^* - \mathbb{E}_{\xi \sim \Xi} f_\xi^*).$$

660 *Proof.* This lemma is directly taken from Proposition 2, [Khaled and Richtárik \[2022\]](#). □

**Lemma D.3.** *Let the second-order continuously differentiable function  $f(\cdot; \xi) : \mathbb{R}^d \rightarrow \mathbb{R}$  be lower bounded by  $f^* := \min_x f(x)$  and have  $L$ -Lipschitz gradient for every  $\xi$ , and  $g(x)$  be an unbiased estimator of  $\nabla f(x)$ . Suppose that  $g(x)$  and  $f(x)$  satisfy the expected smoothness condition*

$$\mathbb{E} \|g(x)\|^2 \leq B \cdot \|\nabla f(x)\|^2 + C.$$

If the learning rate  $\eta \leq \frac{1}{LB}$  and define  $\underline{\delta} := f(x_0) - f^*$ , then the  $T$ -th iteration of [SGD](#) satisfies

$$\min_{0 \leq t \leq T-1} \mathbb{E} \|\nabla f(x_t)\|^2 \leq LC\eta + \frac{2}{\eta T} \underline{\delta}.$$

661 *Proof.* This lemma is directly taken from Theorem 2, [Khaled and Richtárik \[2022\]](#). □

**Lemma D.4.** Let  $g(x)$  be the  $P_k$ -estimator (for  $k = 2, 3, 4$ ),  $f^* := \min_x f(x)$ , and  $f_\xi^* := \min_x f(x; \xi)$ . Then the expected smoothness condition is given by

$$\mathbb{E}\|g(x)\| \leq dL\|\nabla f(x)\|^2 + C_k d^3 \mu^2 + 2dL(f^* - \mathbb{E}_{\xi \sim \Xi} f_\xi^*).$$

where

$$C_k = \begin{cases} \frac{28L^2}{12} & k = 2, \\ \frac{3L^2}{4} & k = 3, \\ \frac{5L^2}{4} & k = 4, \end{cases}$$

is the error term introduced by the zeroth-order gradient estimation. For  $P_2$ -estimator, we choose  $\{\mu_n\}$  and  $\{p_n\}$  such that  $\varrho = \mu^2$  and  $\varphi \leq 2\mu^2$ .

*Proof.* Let  $\hat{\nabla} f(x; \xi)$  be the  $P_k$ -estimator for  $k = 2, 3, 4$ . First, we notice the following variance-decomposition holds:

$$\begin{aligned} \mathbb{E}\|\hat{\nabla} f(x; \xi)\|^2 &= \mathbb{E}\|\hat{\nabla} f(x; \xi) - \nabla f(x; \xi) + \nabla f(x; \xi)\|^2 \\ &= \mathbb{E}\|\nabla f(x; \xi)\|^2 + \mathbb{E}[\text{Var}[P_k v \mid \xi]]. \end{aligned}$$

By Theorem 3.1 and Theorem 3.2, we set

$$\text{Var}[P_k v \mid \xi] \leq (d-1)\|\nabla f(x; \xi)\|^2 + C_k d^3 \mu^2,$$

where  $C_k$  is determined by the estimator; we also assume that the optimal distribution and perturbations are taken obeying Theorem 3.2. As the result,

$$\begin{aligned} \mathbb{E}\|\hat{\nabla} f(x; \xi)\|^2 &\leq \mathbb{E}\|\nabla f(x; \xi)\|^2 + \mathbb{E}[(d-1)\|\nabla f(x; \xi)\|^2 + C_k d^3 \mu^2] \\ &\leq d\mathbb{E}\|\nabla f(x; \xi)\|^2 + C_k d^3 \mu^2 \\ &\stackrel{(i)}{\leq} dL\|\nabla f(x)\|^2 + C_k d^3 \mu^2 + 2dL(f^* - \mathbb{E}_{\xi \sim \Xi} f_\xi^*), \end{aligned}$$

where (i) applies Lemma D.2. It completes the proof.  $\square$

## E Experiments Details

In this section, we describe the detailed experiment setting and the hyperparameter configurations.

### E.1 Synthetic Example

In the synthetic example, we compared gradient estimators across varying dimensions ( $d = 16, 64, 256, 1024, 4096$ ) using both quadratic and logistic functions. For fair comparison, all estimators used a consistent number of function evaluations of 3 and the perturbation stepsize  $\mu = 10^{-5}$  (for  $P_3$ -estimator, we set  $\mu_1 = \mu$ ). The  $P_3$ -estimator was configured with parameter  $s = 2.0$  and followed the same perturbation stepsize scheduling as Example 3.4. We evaluated four gradient estimators: Zipf's  $P_3$ -estimator, one-side two-point estimator with the Gaussian smoothing, one-side two-point estimator with the uniform smoothing, and two-side two-point estimator with the Gaussian smoothing. Each configuration was tested over 100 independent trials with a fixed random seed for reproducibility.

**Code Availability and System Requirements** All source code is included in the supplementary materials. No specific hardware is required; any machine supporting Python 3.10.10 should suffice. A Jupyter notebook version is also provided for convenient execution on Google Colab.

### E.2 Language Model Optimization

In the language model optimization experiment, we compare the performance of different gradient estimators within a vanilla SGD framework for fine-tuning a language model on a sentiment classification task. The learning rate of SGD is fixed at  $\eta = 10^{-4}$ , the batch size of SGD is fixed at 16 (this batch size corresponds to the number of stochastic samples and is different from the batch size in multiple-point zeroth-order estimator), and the perturbation stepsize is set to  $\mu = 10^{-3}$  (for

Table 1: Summary of gradient estimators used in the language model optimization experiment.

| Estimation Method            | Estimator Formula                                    | Batch Size $b$ | # Function Calls | Notes                                            |
|------------------------------|------------------------------------------------------|----------------|------------------|--------------------------------------------------|
| One-Side Two-Point Estimator | $\sum_{i=1}^b \frac{f(x + \mu v_i) - f(x)}{\mu} v_i$ | 3              | 4                | $v_i \stackrel{iid}{\sim} \text{Normal}(0, I_d)$ |
| Two-Side Two-Point Estimator | $\sum_{i=1}^b \frac{f(x + \mu v_i) - f(x)}{\mu} v_i$ | 2              | 4                | $v_i \stackrel{iid}{\sim} \text{Normal}(0, I_d)$ |
| Zipf’s $P_3$ -Estimator      | Eq. (7)                                              | 1              | 3                | $s = 1.5$ , Example 3.4                          |
| Geometric $P_3$ -Estimator   | Eq. (7)                                              | 1              | 3                | $c = 0.5$ , Example 3.3                          |
| Zipf’s $P_4$ -Estimator      | Eq. (6)                                              | 1              | 4                | $s = 1.5$ , Example 3.4                          |
| Geometric $P_4$ -Estimator   | Eq. (6)                                              | 1              | 4                | $c = 0.5$ , Example 3.3                          |

our proposed unbiased estimators, we use  $\mu_1 = \mu$ ). Due to limitations in numerical precision, we do not sample the extreme tail of the distribution. Instead, we truncate the sampling distribution by enforcing  $p_n \geq 10^{-3}$  to ensure numerical stability and avoid excessively small probabilities. All remaining hyperparameters are summarized in Table 1.

**Code Availability and System Requirements** All source code and reproduction instructions are provided in the supplementary materials. Experiments were conducted on a cluster running RHEL 8, equipped with dual AMD EPYC 7763 processors, 512 GB of memory, and seven NVIDIA RTX 5000 GPUs. To reproduce the language model optimization experiments, we recommend using a CUDA-compatible GPU with at least 24 GB of VRAM.

## F Broader Impact

This work introduces a new class of unbiased zeroth-order gradient estimators that offer both theoretical guarantees and practical advantages. By eliminating bias without increasing variance, our method enhances the reliability of optimization in settings where gradient information is unavailable or costly to obtain. These include fine-tuning large language models under memory constraints, conducting black-box adversarial robustness evaluations, and solving scientific computing tasks such as physics-informed neural networks. On the theoretical side, our estimators advance the understanding of zeroth-order optimization and provide new tools for the zeroth-order gradient estimation. This work opens a promising direction for future research in gradient-free optimization and its broad applications in machine learning and beyond.

## G Limitations

Despite the theoretical guarantees and empirical improvements demonstrated by our proposed unbiased zeroth-order gradient estimators, several limitations remain. First, the estimators rely on sampling from an infinite sequence of perturbation steps, but practical implementations must truncate this sequence, which may reintroduce bias or affect variance control. Second, the proposed estimators are based on directional derivatives, which inherently exhibit a dependence on the problem dimension  $d$ ; this dimensional dependence is generally unavoidable for this class of methods. Lastly, while we validate the approach on synthetic tasks and language model fine-tuning, we have not extensively evaluated its performance across a broader range of optimization problems, and the observed empirical gains may not fully generalize to settings involving non-smooth objectives or high levels of evaluation noise.



## NeurIPS Paper Checklist

### 1. Claims

Question: Do the main claims made in the abstract and introduction accurately reflect the paper's contributions and scope?

Answer: [\[Yes\]](#)

Justification: We have included the main contributions in the abstract and introduction in bold.

Guidelines:

- The answer NA means that the abstract and introduction do not include the claims made in the paper.
- The abstract and/or introduction should clearly state the claims made, including the contributions made in the paper and important assumptions and limitations. A No or NA answer to this question will not be perceived well by the reviewers.
- The claims made should match theoretical and experimental results, and reflect how much the results can be expected to generalize to other settings.
- It is fine to include aspirational goals as motivation as long as it is clear that these goals are not attained by the paper.

### 2. Limitations

Question: Does the paper discuss the limitations of the work performed by the authors?

Answer: [\[Yes\]](#)

Justification: We have included a separate limitation section in the appendix.

Guidelines:

- The answer NA means that the paper has no limitation while the answer No means that the paper has limitations, but those are not discussed in the paper.
- The authors are encouraged to create a separate "Limitations" section in their paper.
- The paper should point out any strong assumptions and how robust the results are to violations of these assumptions (e.g., independence assumptions, noiseless settings, model well-specification, asymptotic approximations only holding locally). The authors should reflect on how these assumptions might be violated in practice and what the implications would be.
- The authors should reflect on the scope of the claims made, e.g., if the approach was only tested on a few datasets or with a few runs. In general, empirical results often depend on implicit assumptions, which should be articulated.
- The authors should reflect on the factors that influence the performance of the approach. For example, a facial recognition algorithm may perform poorly when image resolution is low or images are taken in low lighting. Or a speech-to-text system might not be used reliably to provide closed captions for online lectures because it fails to handle technical jargon.
- The authors should discuss the computational efficiency of the proposed algorithms and how they scale with dataset size.
- If applicable, the authors should discuss possible limitations of their approach to address problems of privacy and fairness.
- While the authors might fear that complete honesty about limitations might be used by reviewers as grounds for rejection, a worse outcome might be that reviewers discover limitations that aren't acknowledged in the paper. The authors should use their best judgment and recognize that individual actions in favor of transparency play an important role in developing norms that preserve the integrity of the community. Reviewers will be specifically instructed to not penalize honesty concerning limitations.

### 3. Theory assumptions and proofs

Question: For each theoretical result, does the paper provide the full set of assumptions and a complete (and correct) proof?

Answer: [\[Yes\]](#)

Justification: We have include the full assumptions in the statement of each lemma and theorem.

Guidelines:

- The answer NA means that the paper does not include theoretical results.
- All the theorems, formulas, and proofs in the paper should be numbered and cross-referenced.
- All assumptions should be clearly stated or referenced in the statement of any theorems.
- The proofs can either appear in the main paper or the supplemental material, but if they appear in the supplemental material, the authors are encouraged to provide a short proof sketch to provide intuition.
- Inversely, any informal proof provided in the core of the paper should be complemented by formal proofs provided in appendix or supplemental material.
- Theorems and Lemmas that the proof relies upon should be properly referenced.

#### 4. Experimental result reproducibility

Question: Does the paper fully disclose all the information needed to reproduce the main experimental results of the paper to the extent that it affects the main claims and/or conclusions of the paper (regardless of whether the code and data are provided or not)?

Answer: [\[Yes\]](#)

Justification: We have included the full source codes and reproduction instructions. For synthetic experiment, we additionally include a separate self-contained Jupyter notebook.

Guidelines:

- The answer NA means that the paper does not include experiments.
- If the paper includes experiments, a No answer to this question will not be perceived well by the reviewers: Making the paper reproducible is important, regardless of whether the code and data are provided or not.
- If the contribution is a dataset and/or model, the authors should describe the steps taken to make their results reproducible or verifiable.
- Depending on the contribution, reproducibility can be accomplished in various ways. For example, if the contribution is a novel architecture, describing the architecture fully might suffice, or if the contribution is a specific model and empirical evaluation, it may be necessary to either make it possible for others to replicate the model with the same dataset, or provide access to the model. In general, releasing code and data is often one good way to accomplish this, but reproducibility can also be provided via detailed instructions for how to replicate the results, access to a hosted model (e.g., in the case of a large language model), releasing of a model checkpoint, or other means that are appropriate to the research performed.
- While NeurIPS does not require releasing code, the conference does require all submissions to provide some reasonable avenue for reproducibility, which may depend on the nature of the contribution. For example
  - (a) If the contribution is primarily a new algorithm, the paper should make it clear how to reproduce that algorithm.
  - (b) If the contribution is primarily a new model architecture, the paper should describe the architecture clearly and fully.
  - (c) If the contribution is a new model (e.g., a large language model), then there should either be a way to access this model for reproducing the results or a way to reproduce the model (e.g., with an open-source dataset or instructions for how to construct the dataset).
  - (d) We recognize that reproducibility may be tricky in some cases, in which case authors are welcome to describe the particular way they provide for reproducibility. In the case of closed-source models, it may be that access to the model is limited in some way (e.g., to registered users), but it should be possible for other researchers to have some path to reproducing or verifying the results.

#### 5. Open access to data and code

Question: Does the paper provide open access to the data and code, with sufficient instructions to faithfully reproduce the main experimental results, as described in supplemental material?

Answer: [Yes]

Justification: We have included the full source codes and reproduction instructions. For synthetic experiment, we additionally include a separate self-contained Jupyter notebook.

Guidelines:

- The answer NA means that paper does not include experiments requiring code.
- Please see the NeurIPS code and data submission guidelines (<https://nips.cc/public/guides/CodeSubmissionPolicy>) for more details.
- While we encourage the release of code and data, we understand that this might not be possible, so “No” is an acceptable answer. Papers cannot be rejected simply for not including code, unless this is central to the contribution (e.g., for a new open-source benchmark).
- The instructions should contain the exact command and environment needed to run to reproduce the results. See the NeurIPS code and data submission guidelines (<https://nips.cc/public/guides/CodeSubmissionPolicy>) for more details.
- The authors should provide instructions on data access and preparation, including how to access the raw data, preprocessed data, intermediate data, and generated data, etc.
- The authors should provide scripts to reproduce all experimental results for the new proposed method and baselines. If only a subset of experiments are reproducible, they should state which ones are omitted from the script and why.
- At submission time, to preserve anonymity, the authors should release anonymized versions (if applicable).
- Providing as much information as possible in supplemental material (appended to the paper) is recommended, but including URLs to data and code is permitted.

## 6. Experimental setting/details

Question: Does the paper specify all the training and test details (e.g., data splits, hyper-parameters, how they were chosen, type of optimizer, etc.) necessary to understand the results?

Answer: [Yes]

Justification: We have included the these details in the experiment section and the appendix.

Guidelines:

- The answer NA means that the paper does not include experiments.
- The experimental setting should be presented in the core of the paper to a level of detail that is necessary to appreciate the results and make sense of them.
- The full details can be provided either with the code, in appendix, or as supplemental material.

## 7. Experiment statistical significance

Question: Does the paper report error bars suitably and correctly defined or other appropriate information about the statistical significance of the experiments?

Answer: [Yes]

Justification: In the synthetic experiment, we ran 100 independent trails to obtain the estimation. The median and the  $\pm 25\%$  percentiles are reported in the boxplot.

Guidelines:

- The answer NA means that the paper does not include experiments.
- The authors should answer "Yes" if the results are accompanied by error bars, confidence intervals, or statistical significance tests, at least for the experiments that support the main claims of the paper.
- The factors of variability that the error bars are capturing should be clearly stated (for example, train/test split, initialization, random drawing of some parameter, or overall run with given experimental conditions).

- The method for calculating the error bars should be explained (closed form formula, call to a library function, bootstrap, etc.)
- The assumptions made should be given (e.g., Normally distributed errors).
- It should be clear whether the error bar is the standard deviation or the standard error of the mean.
- It is OK to report 1-sigma error bars, but one should state it. The authors should preferably report a 2-sigma error bar than state that they have a 96% CI, if the hypothesis of Normality of errors is not verified.
- For asymmetric distributions, the authors should be careful not to show in tables or figures symmetric error bars that would yield results that are out of range (e.g. negative error rates).
- If error bars are reported in tables or plots, The authors should explain in the text how they were calculated and reference the corresponding figures or tables in the text.

## 8. Experiments compute resources

Question: For each experiment, does the paper provide sufficient information on the computer resources (type of compute workers, memory, time of execution) needed to reproduce the experiments?

Answer: [Yes]

Justification: We have provided the compute resources information in the appendix.

Guidelines:

- The answer NA means that the paper does not include experiments.
- The paper should indicate the type of compute workers CPU or GPU, internal cluster, or cloud provider, including relevant memory and storage.
- The paper should provide the amount of compute required for each of the individual experimental runs as well as estimate the total compute.
- The paper should disclose whether the full research project required more compute than the experiments reported in the paper (e.g., preliminary or failed experiments that didn't make it into the paper).

## 9. Code of ethics

Question: Does the research conducted in the paper conform, in every respect, with the NeurIPS Code of Ethics <https://neurips.cc/public/EthicsGuidelines>?

Answer: [Yes]

Justification: We exactly follow the NeurIPS Code of Ethics.

Guidelines:

- The answer NA means that the authors have not reviewed the NeurIPS Code of Ethics.
- If the authors answer No, they should explain the special circumstances that require a deviation from the Code of Ethics.
- The authors should make sure to preserve anonymity (e.g., if there is a special consideration due to laws or regulations in their jurisdiction).

## 10. Broader impacts

Question: Does the paper discuss both potential positive societal impacts and negative societal impacts of the work performed?

Answer: [Yes]

Justification: We have included this discussion in the appendix.

Guidelines:

- The answer NA means that there is no societal impact of the work performed.
- If the authors answer NA or No, they should explain why their work has no societal impact or why the paper does not address societal impact.
- Examples of negative societal impacts include potential malicious or unintended uses (e.g., disinformation, generating fake profiles, surveillance), fairness considerations (e.g., deployment of technologies that could make decisions that unfairly impact specific groups), privacy considerations, and security considerations.

- The conference expects that many papers will be foundational research and not tied to particular applications, let alone deployments. However, if there is a direct path to any negative applications, the authors should point it out. For example, it is legitimate to point out that an improvement in the quality of generative models could be used to generate deepfakes for disinformation. On the other hand, it is not needed to point out that a generic algorithm for optimizing neural networks could enable people to train models that generate Deepfakes faster.
- The authors should consider possible harms that could arise when the technology is being used as intended and functioning correctly, harms that could arise when the technology is being used as intended but gives incorrect results, and harms following from (intentional or unintentional) misuse of the technology.
- If there are negative societal impacts, the authors could also discuss possible mitigation strategies (e.g., gated release of models, providing defenses in addition to attacks, mechanisms for monitoring misuse, mechanisms to monitor how a system learns from feedback over time, improving the efficiency and accessibility of ML).

## 11. Safeguards

Question: Does the paper describe safeguards that have been put in place for responsible release of data or models that have a high risk for misuse (e.g., pretrained language models, image generators, or scraped datasets)?

Answer: [NA]

Justification: The paper poses no such risks.

Guidelines:

- The answer NA means that the paper poses no such risks.
- Released models that have a high risk for misuse or dual-use should be released with necessary safeguards to allow for controlled use of the model, for example by requiring that users adhere to usage guidelines or restrictions to access the model or implementing safety filters.
- Datasets that have been scraped from the Internet could pose safety risks. The authors should describe how they avoided releasing unsafe images.
- We recognize that providing effective safeguards is challenging, and many papers do not require this, but we encourage authors to take this into account and make a best faith effort.

## 12. Licenses for existing assets

Question: Are the creators or original owners of assets (e.g., code, data, models), used in the paper, properly credited and are the license and terms of use explicitly mentioned and properly respected?

Answer: [Yes]

Justification: We have clearly cited the related papers of the code, data, and models.

Guidelines:

- The answer NA means that the paper does not use existing assets.
- The authors should cite the original paper that produced the code package or dataset.
- The authors should state which version of the asset is used and, if possible, include a URL.
- The name of the license (e.g., CC-BY 4.0) should be included for each asset.
- For scraped data from a particular source (e.g., website), the copyright and terms of service of that source should be provided.
- If assets are released, the license, copyright information, and terms of use in the package should be provided. For popular datasets, [paperswithcode.com/datasets](https://paperswithcode.com/datasets) has curated licenses for some datasets. Their licensing guide can help determine the license of a dataset.
- For existing datasets that are re-packaged, both the original license and the license of the derived asset (if it has changed) should be provided.

- If this information is not available online, the authors are encouraged to reach out to the asset’s creators.

### 13. New assets

Question: Are new assets introduced in the paper well documented and is the documentation provided alongside the assets?

Answer: [Yes]

Justification: All codes come with self-contained names and comments. The file, README.md, is included as the documentation.

Guidelines:

- The answer NA means that the paper does not release new assets.
- Researchers should communicate the details of the dataset/code/model as part of their submissions via structured templates. This includes details about training, license, limitations, etc.
- The paper should discuss whether and how consent was obtained from people whose asset is used.
- At submission time, remember to anonymize your assets (if applicable). You can either create an anonymized URL or include an anonymized zip file.

### 14. Crowdsourcing and research with human subjects

Question: For crowdsourcing experiments and research with human subjects, does the paper include the full text of instructions given to participants and screenshots, if applicable, as well as details about compensation (if any)?

Answer: [NA]

Justification: The paper does not involve crowdsourcing nor research with human subjects.

Guidelines:

- The answer NA means that the paper does not involve crowdsourcing nor research with human subjects.
- Including this information in the supplemental material is fine, but if the main contribution of the paper involves human subjects, then as much detail as possible should be included in the main paper.
- According to the NeurIPS Code of Ethics, workers involved in data collection, curation, or other labor should be paid at least the minimum wage in the country of the data collector.

### 15. Institutional review board (IRB) approvals or equivalent for research with human subjects

Question: Does the paper describe potential risks incurred by study participants, whether such risks were disclosed to the subjects, and whether Institutional Review Board (IRB) approvals (or an equivalent approval/review based on the requirements of your country or institution) were obtained?

Answer: [NA]

Justification: The paper does not involve crowdsourcing nor research with human subjects.

Guidelines:

- The answer NA means that the paper does not involve crowdsourcing nor research with human subjects.
- Depending on the country in which research is conducted, IRB approval (or equivalent) may be required for any human subjects research. If you obtained IRB approval, you should clearly state this in the paper.
- We recognize that the procedures for this may vary significantly between institutions and locations, and we expect authors to adhere to the NeurIPS Code of Ethics and the guidelines for their institution.
- For initial submissions, do not include any information that would break anonymity (if applicable), such as the institution conducting the review.



1032       **16. Declaration of LLM usage**  
1033       Question: Does the paper describe the usage of LLMs if it is an important, original, or  
1034       non-standard component of the core methods in this research? Note that if the LLM is used  
1035       only for writing, editing, or formatting purposes and does not impact the core methodology,  
1036       scientific rigorousness, or originality of the research, declaration is not required.  
1037       Answer: [NA]  
1038       Justification: The core method development in this research does not involve LLMs as any  
1039       important, original, or non-standard components.  
1040       Guidelines:  
1041       • The answer NA means that the core method development in this research does not  
1042       involve LLMs as any important, original, or non-standard components.  
1043       • Please refer to our LLM policy (<https://neurips.cc/Conferences/2025/LLM>)  
1044       for what should or should not be described.  
1045
